# Supplementary material for: Cycloartane Saponins from Astragalus glycyphyllos and Their In Vitro Neuroprotective, Antioxidant, and hMAO-B-Inhibiting Effects
Source: MDPI journal article supplement (doi:10.3390/metabo13070857), 2023-07-19
Supplement: s1 [file s1]

# Cycloartane Saponins from *Astragalus glycyphyllos* and Their In Vitro Neuroprotective, Antioxidant, and hMAO-B-Inhibiting Effects

Ivan Stambolov <sup>1</sup>, Aleksandar Shkondrov <sup>1</sup>, Olaf Kunert <sup>2</sup>, Franz Bucar <sup>3</sup>, Magdalena Kondeva-Burdina <sup>4</sup> and Ilina Krasteva <sup>1,\*</sup>

<sup>1</sup> Department of Pharmacognosy, Faculty of Pharmacy, Medical University of Sofia, 2 Dunav st., 1000 Sofia, Bulgaria; istambolov@pharmfac.mu-sofia.bg (I.S.); shkondrov@pharmfac.mu-sofia.bg (A.S.)

<sup>2</sup> Department of Pharmaceutical Chemistry, Institute of Pharmaceutical Sciences, University of Graz, Universitätsplatz 1, A-8010 Graz, Austria; olaf.kunert@uni-graz.at

<sup>3</sup> Department of Pharmacognosy, Institute of Pharmaceutical Sciences, University of Graz, Beethovenstrasse 8, A-8010 Graz, Austria; franz.bucar@uni-graz.at

<sup>4</sup> Laboratory of Drug Metabolism and Drug Toxicity, Department of Pharmacology, Pharmacotherapy and Toxicology, Faculty of Pharmacy, Medical University of Sofia, 2 Dunav st., 1000 Sofia, Bulgaria; mkondeva@pharmfac.mu-sofia.bg

\* Correspondence: ikrasteva@pharmfac.mu-sofia.bg; Tel.: +359-2-9236-552

## Supplementary material

**Table S1.** <sup>1</sup>H NMR spectroscopic data (700 MHz, *J* in Hz) and <sup>13</sup>C NMR spectroscopic data (175 MHz) of **S1** in methanol-*d*<sub>4</sub>

| position | $\delta_C$ , type     | $\delta_H$             | HMBC correlations<br>$\delta_C$ , (atom)               | ROESY cross peaks<br>$\delta_H$ , (atom)           |
|----------|-----------------------|------------------------|--------------------------------------------------------|----------------------------------------------------|
| 1        | 33.5, CH <sub>2</sub> | 1.54, t (13.0)<br>1.21 | 31.9 (C-19), 30.7 (C-2)                                |                                                    |
| 2        | 30.7, CH <sub>2</sub> | 1.91, m<br>1.66        |                                                        |                                                    |
| 3        | 89.3, CH              | 3.18, d (~13)          | 106.2 (Xyl-1), 43.3 (C-4),<br>28.6 (C-29), 16.8 (C-28) | 1.91 (H-2), 1.54 (H-1),<br>1.35 (H-5), 1.28 (H-29) |
| 4        | 43.2, C               | -                      |                                                        |                                                    |

|    |                       |                              |                                                                                                 |                                        |
|----|-----------------------|------------------------------|-------------------------------------------------------------------------------------------------|----------------------------------------|
| 5  | 54.8, CH              | 1.35, d (9.9)                |                                                                                                 |                                        |
| 6  | 69.6, CH              | 3.44, m                      | 54.8 (C-5), 48.8 (C-8),<br>43.2 (C-4)                                                           | 1.79 (H-8), 1.45 (H-7),<br>0.53 (H-19) |
| 7  | 38.8, CH <sub>2</sub> | 1.45<br>1.33                 |                                                                                                 |                                        |
| 8  | 48.8, CH              | 1.79, dd (12.0, 4.2)         | 69.6 (C-6), 48.8 (C-15),<br>47.7 (C-14), 38.8 (C-7),<br>31.9 (C-19), 22.1 (C-9),<br>20.5 (C-30) | 3.44 (H-6), 1.45 (H-7),<br>0.53 (H-19) |
| 9  | 22.1, C               | -                            |                                                                                                 |                                        |
| 10 | 30.1, C               | -                            |                                                                                                 |                                        |
| 11 | 27.0, CH <sub>2</sub> | 1.97<br>1.19                 |                                                                                                 |                                        |
| 12 | 33.9, CH <sub>2</sub> | 1.66<br>1.60, td (12.0, 3.2) | 27.0 (C-11)                                                                                     |                                        |
| 13 | 46.4, C               | -                            |                                                                                                 |                                        |
| 14 | 47.4, C               | -                            |                                                                                                 |                                        |
| 15 | 48.8, CH <sub>2</sub> | 1.99<br>1.38                 | 73.1 (C-16), 58.1 (C-17),<br>47.4 (C-14), 46.4 (C-13),<br>20.4 (C-30)                           |                                        |

|    |                       |                                |                                                                                      |                                                       |
|----|-----------------------|--------------------------------|--------------------------------------------------------------------------------------|-------------------------------------------------------|
| 16 | 73.1, CH              | 4.40, m                        | 46.4 (C-13)                                                                          | 2.09 (H-22), 1.99 (H-15),<br>1.66 (H-17), 0.94 (H-30) |
| 17 | 58.1, CH              | 1.66                           |                                                                                      |                                                       |
| 18 | 19.2, CH <sub>3</sub> | 1.13 s                         | 58.1 (C-17), 47.4 (C-14),<br>46.4 (C-13), 33.9 (C-12)                                | 1.79 (H-8), 0.53 (H-19),<br>0.37 (H-19)               |
| 19 | 31.9, CH <sub>2</sub> | 0.52, d (4.0)<br>0.37, d (4.0) | 54.8 (C-5), 48.8 (C-8),<br>33.5 (C-1), 30.4 (C-10),<br>27.0 (C-11), 22.1 (C-9)       | 3.44 (H-6), 1.79 (H-8),<br>1.21 (H1), 1.02 (H-28)     |
| 20 | 32.5, CH              | 1.75                           | 58.1 (C-17), 34.6 (C-22),<br>32.5 (C-20)                                             |                                                       |
| 21 | 18.7, CH <sub>3</sub> | 0.93, d (6.5)                  |                                                                                      | 1.66 (H-17)                                           |
| 22 | 34.6, CH <sub>2</sub> | 2.08, brt (12.5)<br>0.96       | 92.5 (C-24), 58.1 (C-17),<br>32.5 (C-20), 30.4 (C-23),<br>18.7 (C-21)                |                                                       |
| 23 | 30.4, CH <sub>2</sub> | 1.70<br>1.25                   |                                                                                      |                                                       |
| 24 | 92.5, CH              | 3.30                           | 107.3 (Ara-1), 74.9 (C-25),<br>34.6 (C-22), 30.4 (C-23),<br>26.4 (C-26), 24.0 (C-27) | 4.38 (Ara-1), 1.70 (H-23)                             |
| 25 | 74.9, C               | -                              |                                                                                      |                                                       |

|     |                       |                                        |                                                    |                         |
|-----|-----------------------|----------------------------------------|----------------------------------------------------|-------------------------|
| 26  | 26.4, CH <sub>3</sub> | 1.15, s                                | 92.5 (C-24), 74.9 (C-25),<br>24.0 (C-27)           |                         |
| 27  | 24.0, CH <sub>3</sub> | 1.18, s                                | 92.5 (C-24), 74.9 (C-25),<br>26.4 (C-26)           |                         |
| 28  | 16.8, CH <sub>3</sub> | 1.02, s                                | 89.3 (C-3), 54.8 (C-5),<br>43.2 (C-4), 28.6 (C-29) |                         |
| 29  | 28.6, CH <sub>3</sub> | 1.28, s                                | 89.3 (C-3), 54.8 (C-5),<br>43.2 (C-4), 16.8 (C-28) |                         |
| 30  | 20.4, CH <sub>3</sub> | 0.94, s                                | 58.1 (C-17), 34.6 (C-22),<br>32.5 (C-20)           | 1.99 (H-15), 1.33 (H-7) |
|     |                       |                                        |                                                    |                         |
| Xyl |                       |                                        |                                                    |                         |
| 1   | 106.2, CH             | 4.37, d (~6.9)                         | 89.3 (C-3), 78.8 (Xyl-3),<br>66.5 (Xyl-5)          |                         |
| 2   | 78.9, CH              | 3.42                                   |                                                    |                         |
| 3   | 78.8, CH              | 3.42                                   |                                                    |                         |
| 4   | 71.6, CH              | 3.47                                   |                                                    |                         |
| 5   | 66.5, CH <sub>2</sub> | 3.84, dd (11.0, 5.3)<br>3.17, t (10.6) | 106.2 (Xyl-1), 78.8 (Xyl-3),<br>71.6 (Xyl-4)       |                         |

|     |                       |                              |                                              |                                              |
|-----|-----------------------|------------------------------|----------------------------------------------|----------------------------------------------|
|     |                       |                              |                                              |                                              |
| Rha |                       |                              |                                              |                                              |
| 1   | 102.1, CH             | 5.33, brs                    | 78.8 (Xyl-2), 72.2 (Rha-2),<br>70.1 (Rha-5)  | 3.94 (Rha-2), 3.42 (Xyl-2/3),<br>1.02 (H-28) |
| 2   | 72.2, CH              | 3.94, brs                    |                                              |                                              |
| 3   | 72.2, CH              | 3.74, dd (9.3, 2.8)          |                                              |                                              |
| 4   | 74.0, CH              | 3.38, t (9.6)                |                                              |                                              |
| 5   | 70.1, CH              | 3.98, dq (9.4, 6.1)          |                                              |                                              |
|     | 18.1, CH <sub>3</sub> | 1.23, d (6.3)                | 74.0 (Rha-4), 70.1 (Rha-5)                   |                                              |
|     |                       |                              |                                              |                                              |
| Ara |                       |                              |                                              |                                              |
| 1   | 107.4, CH             | 4.38, d (7.5)                | 92.5 (C-24), 73.6 (Ara-2),<br>68.0 (Ara-5)   |                                              |
| 2   | 73.7, CH              | 3.58                         |                                              |                                              |
| 3   | 75.0, CH              | 3.49                         |                                              |                                              |
| 4   | 70.2, CH              | 3.78, brs                    |                                              |                                              |
| 5   | 68.0, CH <sub>2</sub> | 3.87, dd (12.5, 1.8)<br>3.56 | 107.4 (Ara-1), 75.0 (Ara-3),<br>70.2 (Ara-4) |                                              |

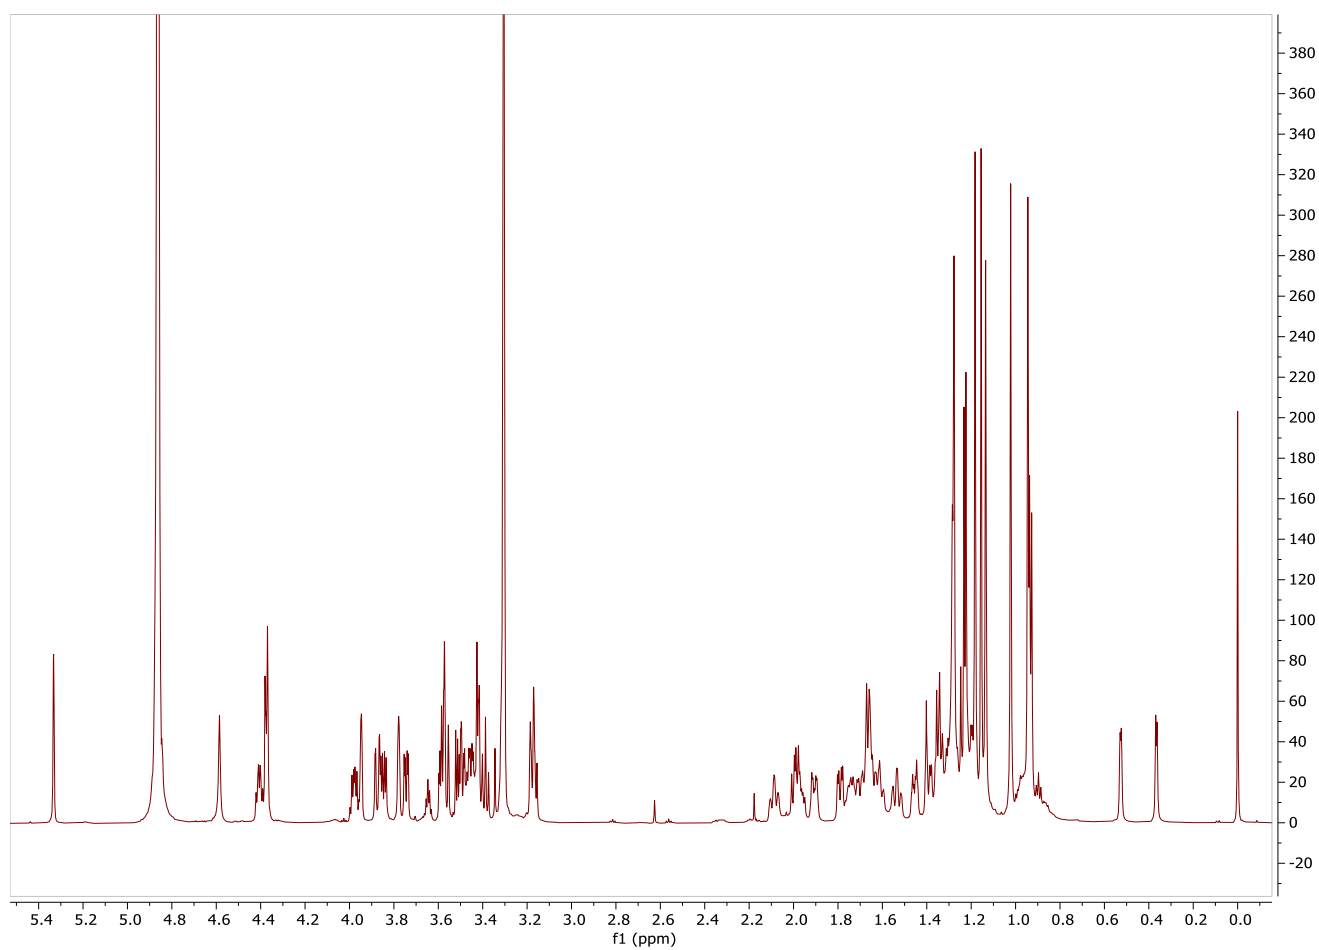

**Figure S1:**  $^1\text{H}$ -NMR spectrum (700 MHz, methanol- $d_4$ ) of compound **S1**.

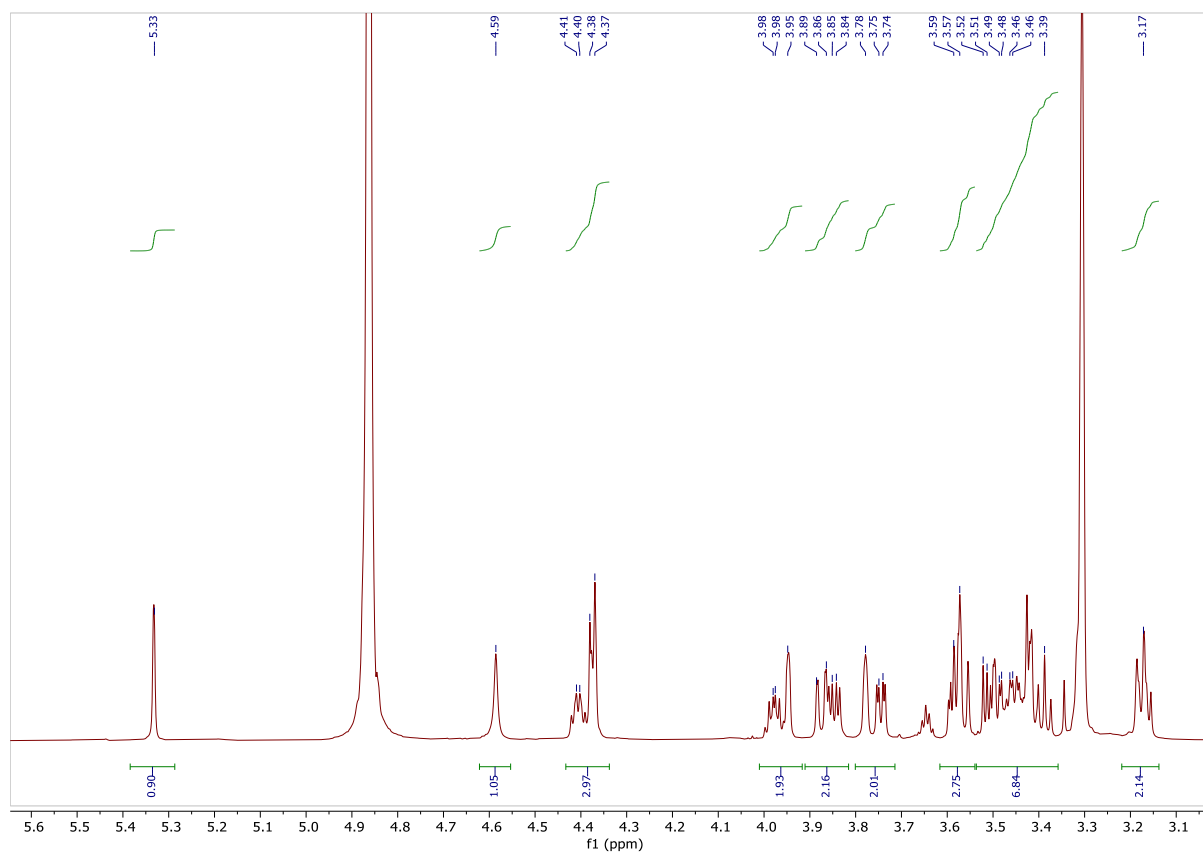

**Figure S2:** Expansion of the  $^1\text{H}$ -NMR spectrum of compound S1 (sugar region).

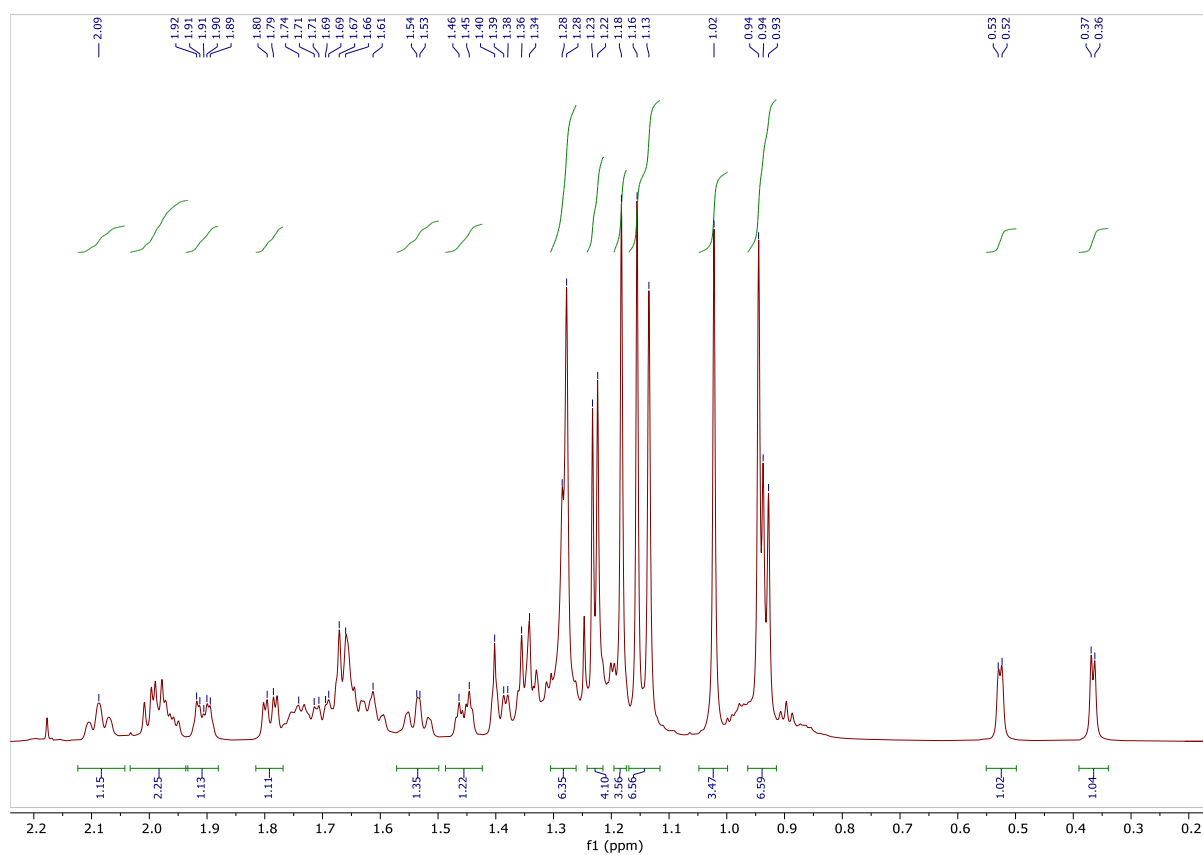

**Figure S3:** Expansion of the  $^1\text{H}$ -NMR spectrum of compound S1 (aglycon region).

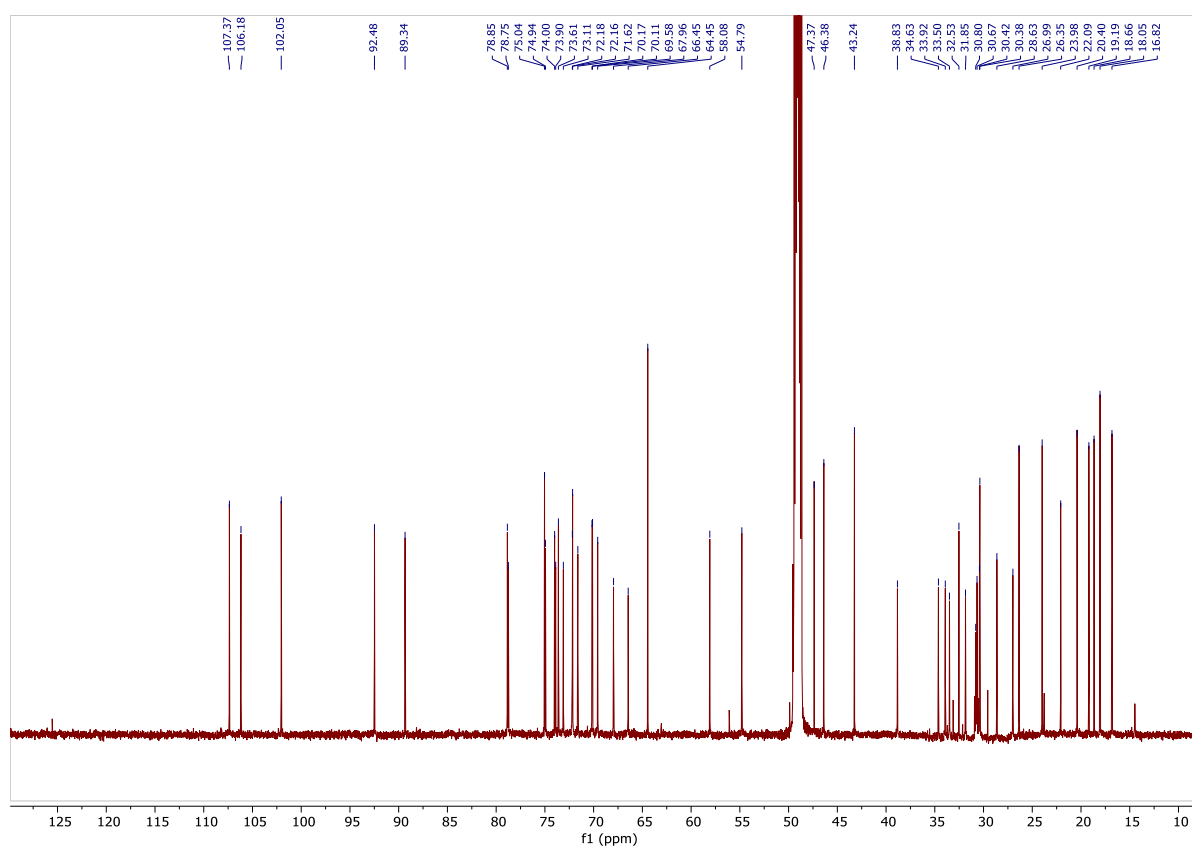

**Figure S4:**  $^{13}\text{C}$ -NMR spectrum (175 MHz, methanol- $d_4$ ) of compound **S1**.

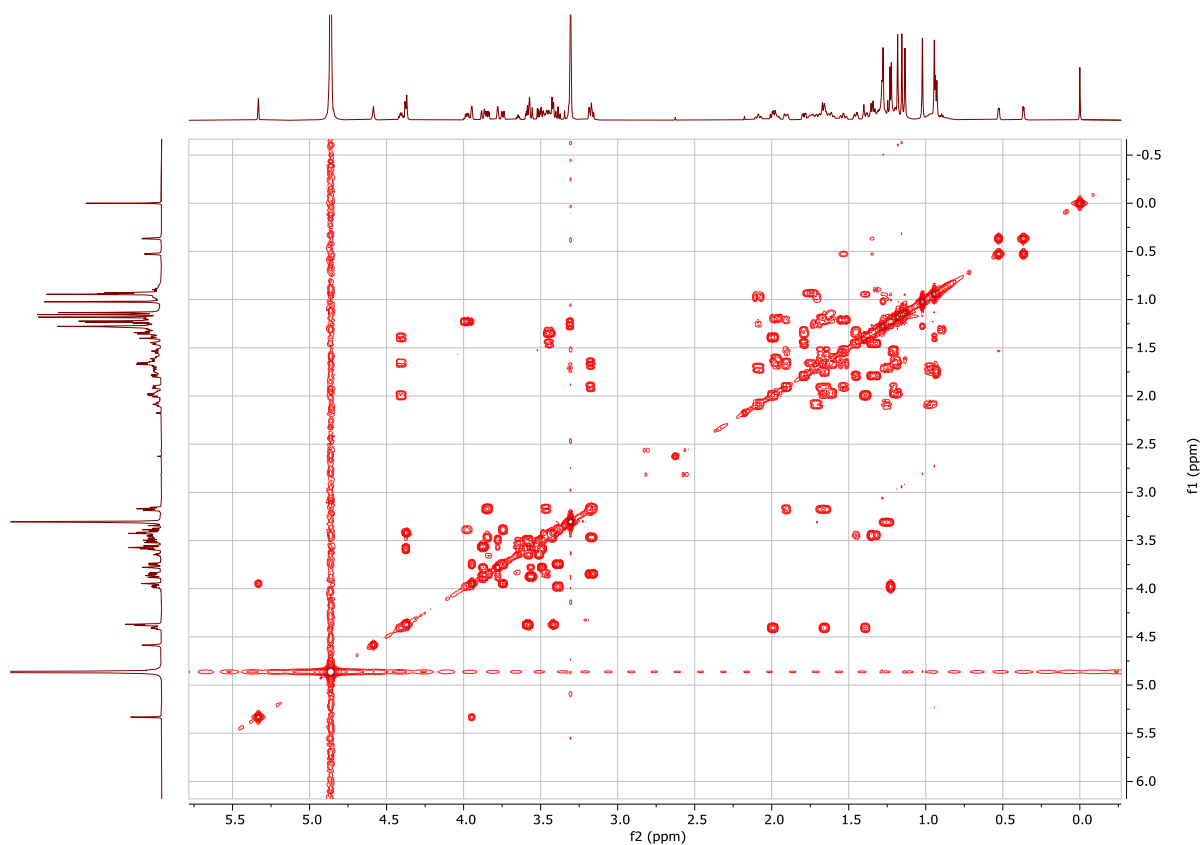

**Figure S5:** COSY spectrum (700 MHz, methanol- $d_4$ ) of compound **S1**.

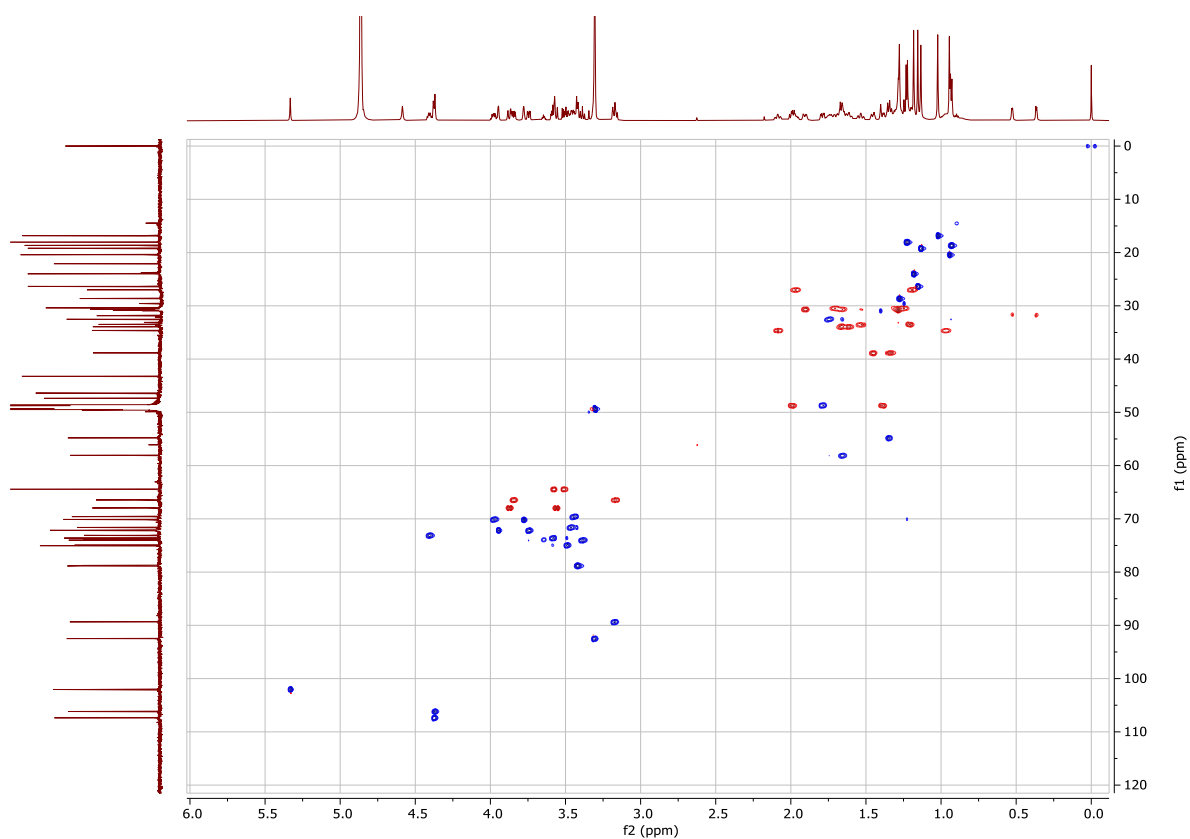

**Figure S6:** HSQC spectrum (700/175 MHz, methanol-*d*<sub>4</sub>) of compound **S1**.

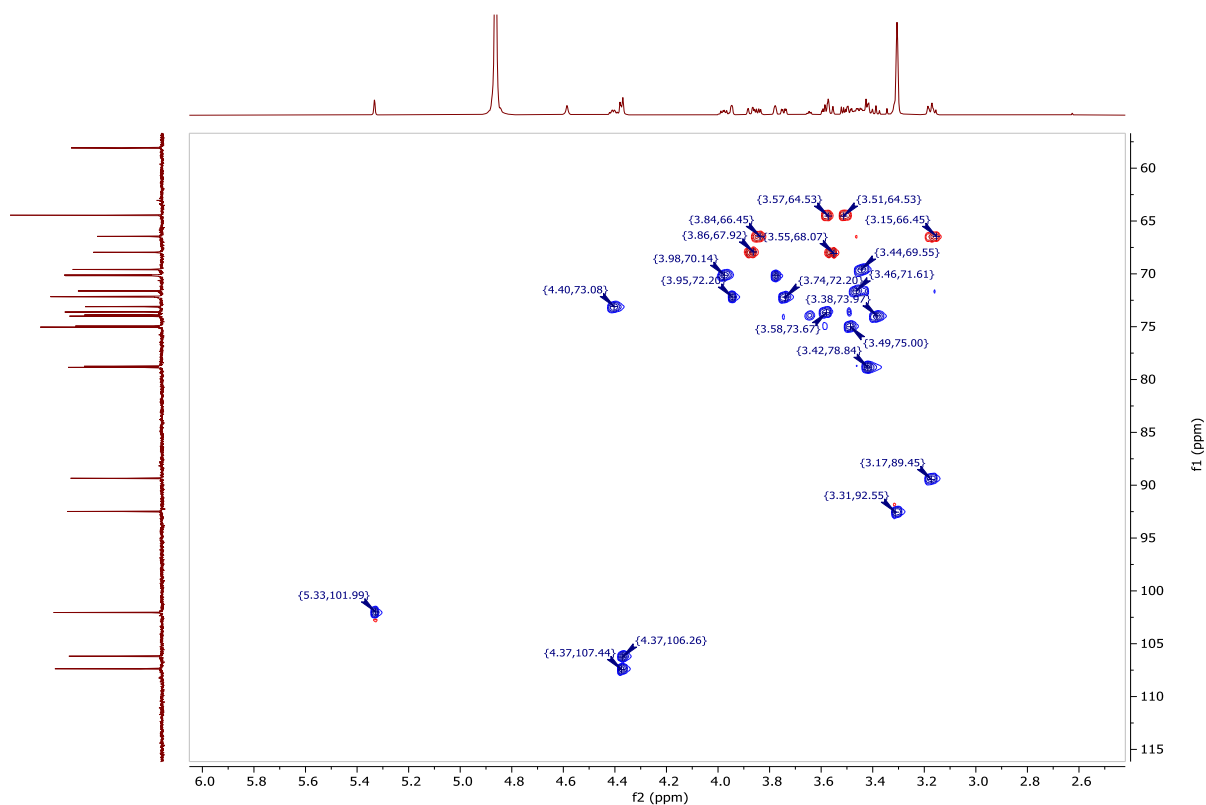

**Figure S7:** Expansion of the sugar region of the HSQC spectrum of compound **S1**.

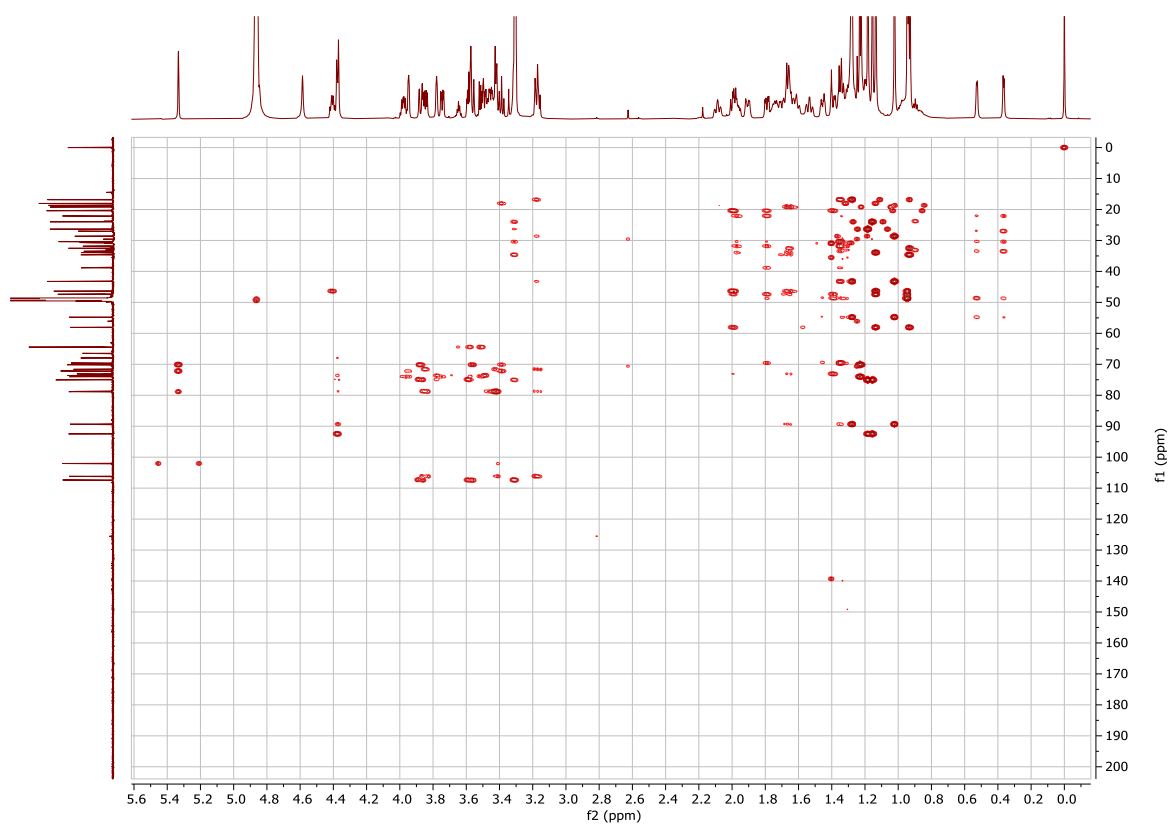

**Figure S8:** HMBC spectrum (700/175 MHz, methanol- $d_4$ ) of compound **S1**.

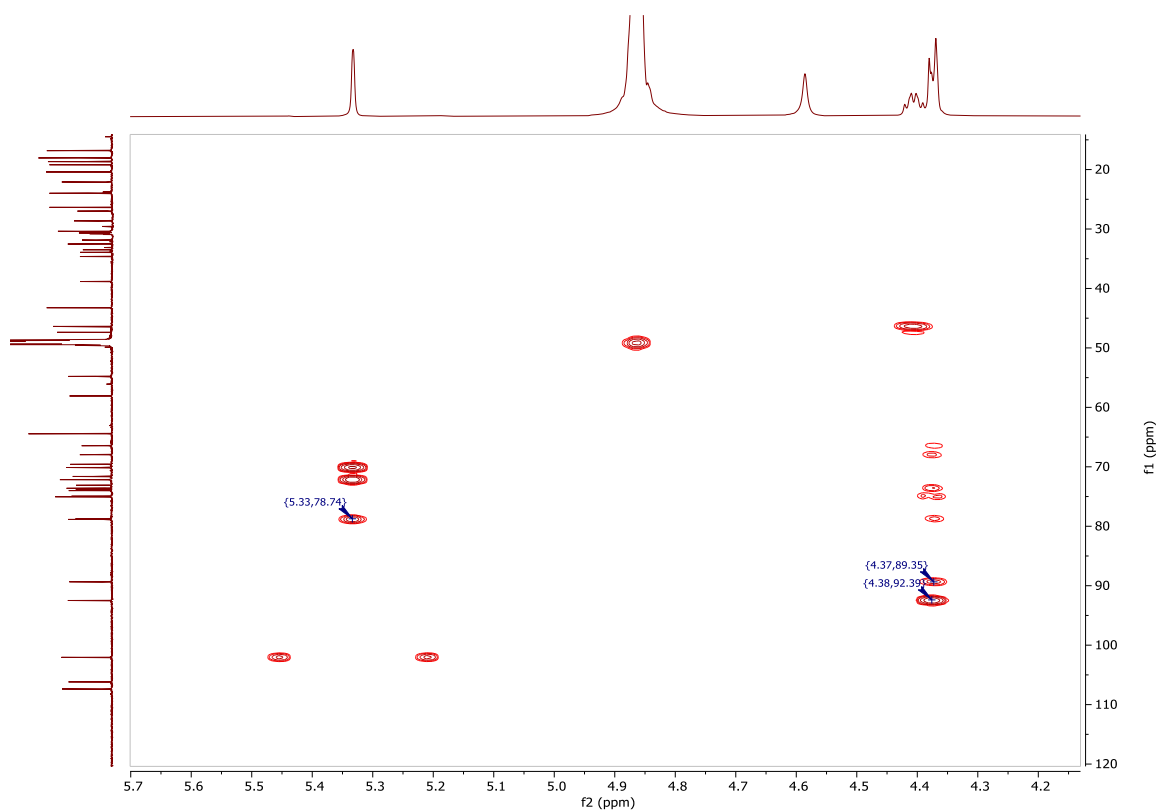

**Figure S9:** Expansion of the sugar region of the HMBC spectrum of compound **S1**.

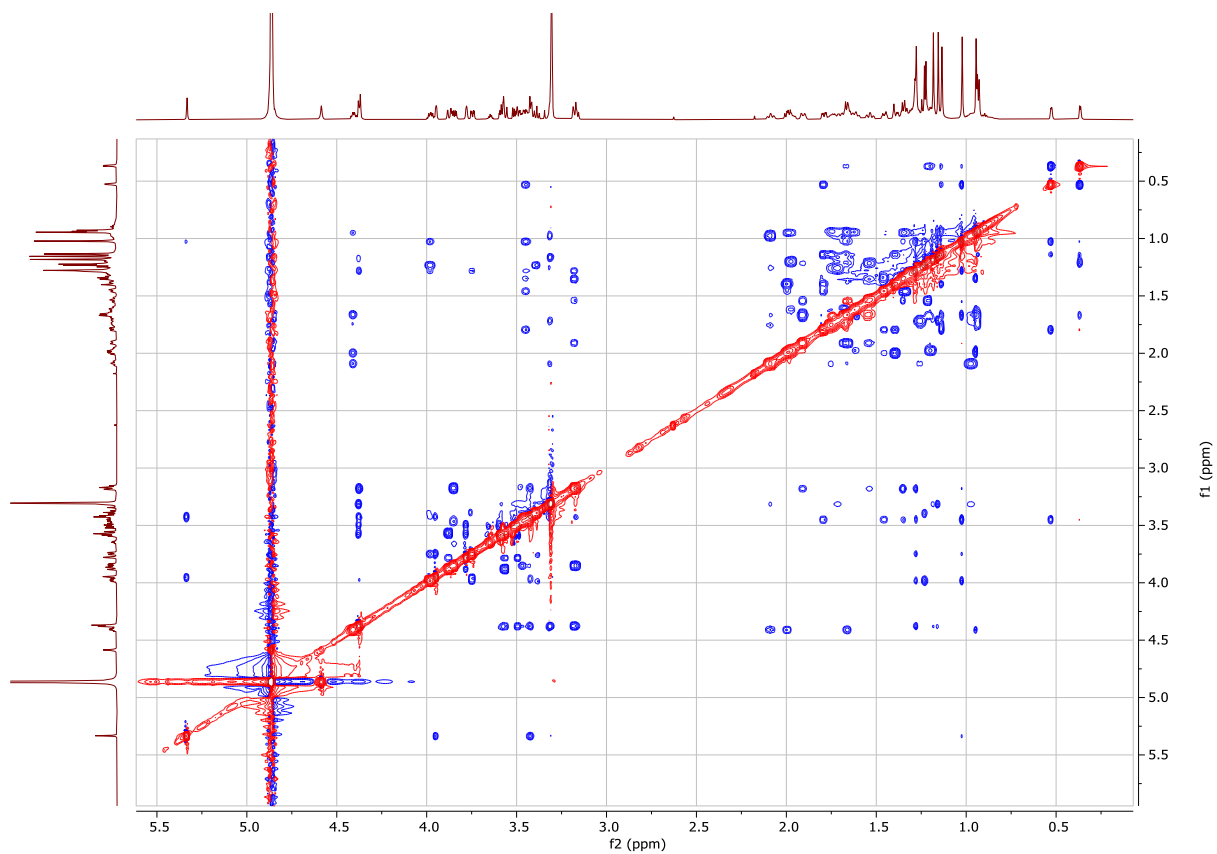

**Figure S10:** ROESY-spectrum (700 MHz, methanol- $d_4$ ) of compound **S1**.

**Table S2.**  $^1\text{H}$  NMR spectroscopic data (700 MHz,  $J$  in Hz) and  $^{13}\text{C}$  NMR spectroscopic data (175 MHz) of compound **S2** in methanol- $d_4$  and pyridine- $d_5$ .

|                 | <b>S2 in MeOH-<math>d_4</math></b>          |                                       |  | <b>S2 in pyridine-<math>d_5</math></b>      |                                       |
|-----------------|---------------------------------------------|---------------------------------------|--|---------------------------------------------|---------------------------------------|
| <b>position</b> | <b><math>\delta_{\text{C}}</math>, type</b> | <b><math>\delta_{\text{H}}</math></b> |  | <b><math>\delta_{\text{C}}</math>, type</b> | <b><math>\delta_{\text{H}}</math></b> |
| 1               | 33.5, CH <sub>2</sub>                       | 1.54<br>1.21                          |  | 32.6, CH <sub>2</sub>                       | 1.62<br>1.23                          |
| 2               | 30.7, CH <sub>2</sub>                       | 1.91<br>1.66                          |  | 30.7, CH <sub>2</sub>                       | 1.91<br>1.66                          |
| 3               | 89.3, CH                                    | 3.18                                  |  | 89.3, CH                                    | 3.58                                  |
| 4               | 43.2, C                                     | -                                     |  | 42.7, C                                     | -                                     |
| 5               | 54.8, CH                                    | 1.35                                  |  | 54.2, CH                                    | 1.73                                  |
| 6               | 69.6, CH                                    | 3.45                                  |  | 67.8, CH                                    | 3.77                                  |
| 7               | 39.9, CH <sub>2</sub>                       | 1.35<br>1.46                          |  | 38.6, CH <sub>2</sub>                       | 1.67<br>1.84                          |
| 8               | 48.8, CH                                    | 1.80                                  |  | 46.9, CH                                    | 1.94                                  |
| 9               | 21.8, C                                     | -                                     |  | 20.8, C                                     | -                                     |
| 10              | 30.7, C                                     | -                                     |  | 32.6, C                                     | -                                     |
| 11              | 27.0, CH <sub>2</sub>                       | 2.01<br>1.22                          |  | 26.2, CH <sub>2</sub>                       | 1.91<br>1.20                          |
| 12              | 33.9, CH <sub>2</sub>                       | 1.68<br>1.63                          |  | 33.4, CH <sub>2</sub>                       | 1.64<br>1.59                          |
| 13              | 46.0, C                                     | -                                     |  | 46.1, C                                     | -                                     |
| 14              | 47.1, C                                     | -                                     |  | 45.0, C                                     | -                                     |
| 15              | 48.8, CH <sub>2</sub>                       | 1.95<br>1.40                          |  | 48.8, CH <sub>2</sub>                       | 2.12<br>1.76                          |
| 16              | 73.1, CH                                    | 4.65                                  |  | 73.4, CH                                    | 5.03                                  |
| 17              | 59.1, CH                                    | 2.36                                  |  | 58.4, CH                                    | 2.54                                  |
| 18              | 22.0, CH <sub>3</sub>                       | 1.26                                  |  | 21.4, CH <sub>3</sub>                       | 1.42                                  |

|     |                       |              |  |                       |              |
|-----|-----------------------|--------------|--|-----------------------|--------------|
| 19  | 32.3, CH <sub>2</sub> | 0.55<br>0.37 |  | 30.4, CH <sub>2</sub> | 0.58<br>0.28 |
| 20  | 88.4, C               | -            |  | 87.3, C               | -            |
| 21  | 28.5, CH <sub>3</sub> | 1.21         |  | 28.6, CH <sub>3</sub> | 1.32         |
| 22  | 35.5, CH <sub>2</sub> | 2.16<br>1.64 |  | 34.9, CH <sub>2</sub> | 1.67<br>3.11 |
| 23  | 26.8, CH <sub>2</sub> | 2.04<br>2.01 |  | 26.4, CH <sub>2</sub> | 2.35<br>2.05 |
| 24  | 82.7, CH              | 3.75         |  | 81.7, CH              | 3.89         |
| 25  | 72.5, C               | -            |  | 71.3, C               | -            |
| 26  | 26.7, CH <sub>3</sub> | 1.12         |  | 27.1, CH <sub>3</sub> | 1.31         |
| 27  | 27.7, CH <sub>3</sub> | 1.25         |  | 28.2, CH <sub>3</sub> | 1.54         |
| 28  | 28.7, CH <sub>3</sub> | 1.28         |  | 28.9, CH <sub>3</sub> | 1.98         |
| 29  | 16.8, CH <sub>3</sub> | 1.02         |  | 16.8, CH <sub>3</sub> | 1.52         |
| 30  | 20.6, CH <sub>3</sub> | 0.99         |  | 20.8, CH <sub>3</sub> | 1.01         |
|     |                       |              |  |                       |              |
| Xyl |                       |              |  |                       |              |
| 1   | 106.2, CH             | 4.37         |  | 106.1, CH             | 4.91         |
| 2   | 78.8*, CH             | 3.43         |  | 78.2, CH              | 4.30         |
| 3   | 78.9*, CH             | 3.43         |  | 79.5, CH              | 4.17         |
| 4   | 71.6, CH              | 3.47         |  | 71.5, CH              | 4.17         |
| 5   | 66.5, CH <sub>2</sub> | 3.85<br>3.17 |  | 66.9, CH <sub>2</sub> | 4.33<br>3.67 |
|     |                       |              |  |                       |              |
| Rha |                       |              |  |                       |              |
| 1   | 102.1, CH             | 5.33         |  | 102.1, CH             | 6.56         |
| 2   | 72.1, CH              | 3.95         |  | 72.5, CH              | 4.89         |
| 3   | 72.1, CH              | 3.74         |  | 72.5, CH              | 4.75         |

|   |                       |      |  |                       |      |
|---|-----------------------|------|--|-----------------------|------|
| 4 | 74.0, CH              | 3.38 |  | 74.2, CH              | 4.38 |
| 5 | 70.1, CH              | 3.97 |  | 69.8, CH              | 4.90 |
|   | 18.1, CH <sub>3</sub> | 1.23 |  | 18.8, CH <sub>3</sub> | 1.76 |
|   |                       |      |  |                       |      |

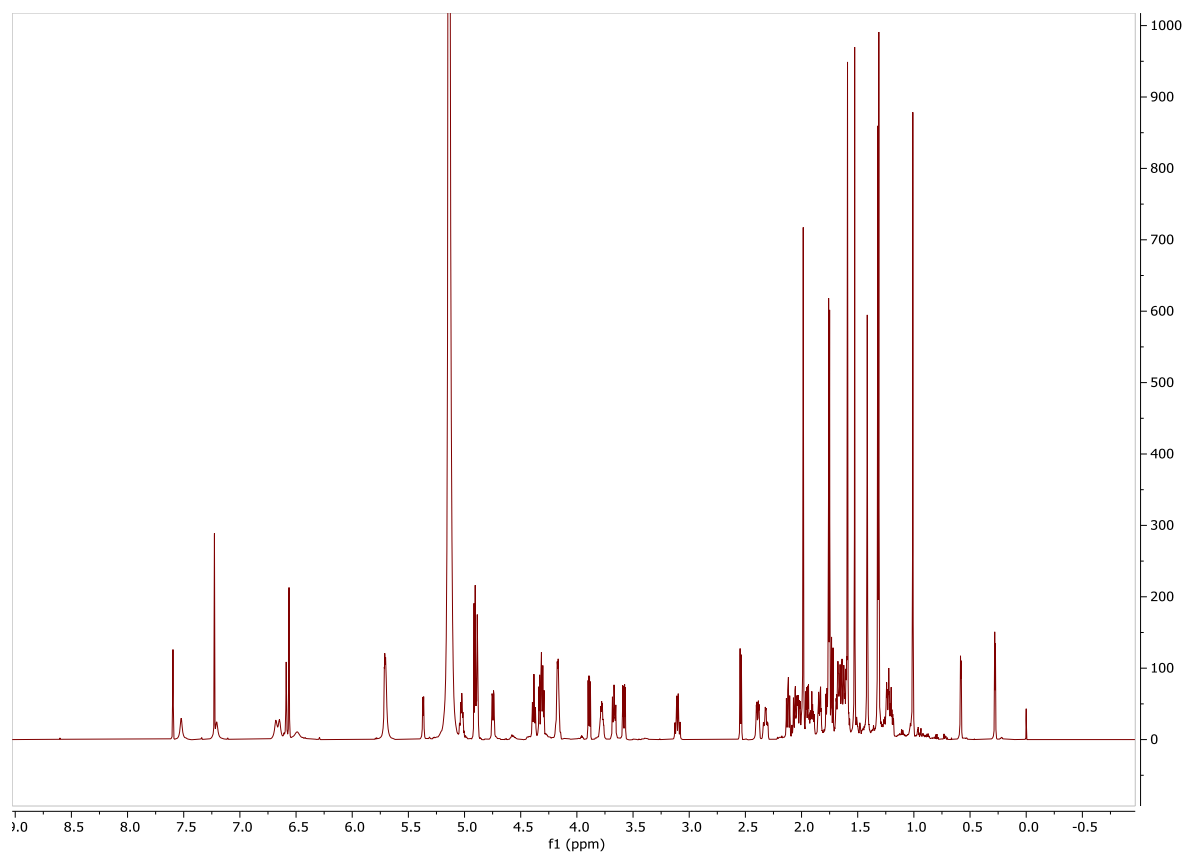

**Figure S11:**  $^1\text{H}$ -NMR spectrum (700 MHz, pyridine- $d_5$ ) of compound **S2**.

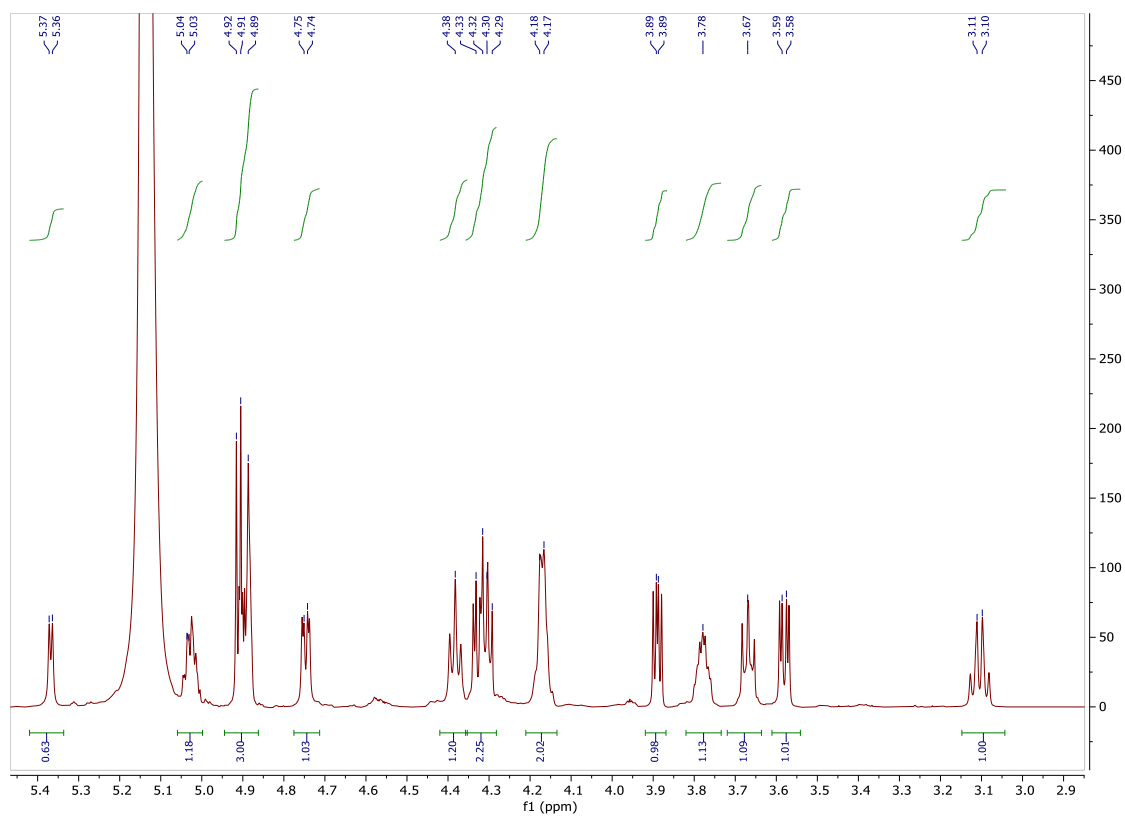

**Figure S12:** Expansion of the  $^1\text{H}$ -NMR (700 MHz, pyridine- $d_5$ ) spectrum of compound S2.

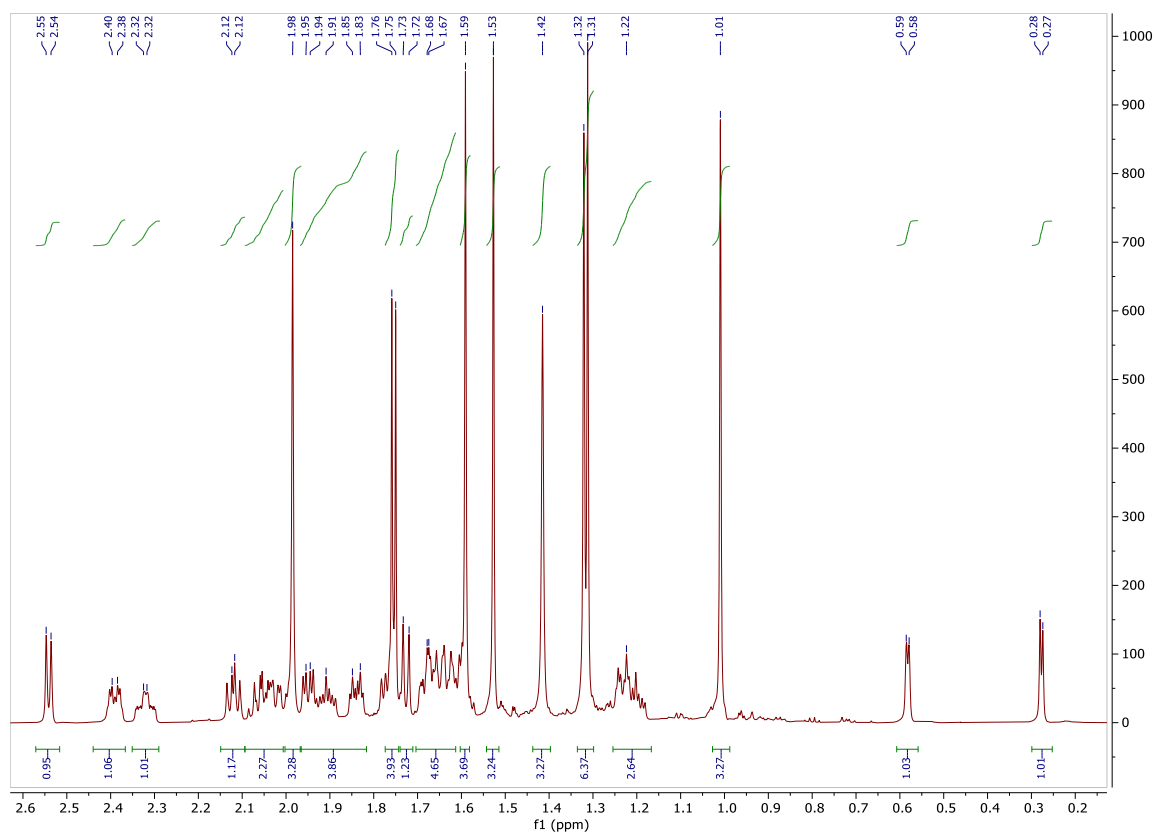

**Figure S13:** Expansion of the  $^1\text{H}$ -NMR (700 MHz, pyridine- $d_5$ ) spectrum of compound S2.

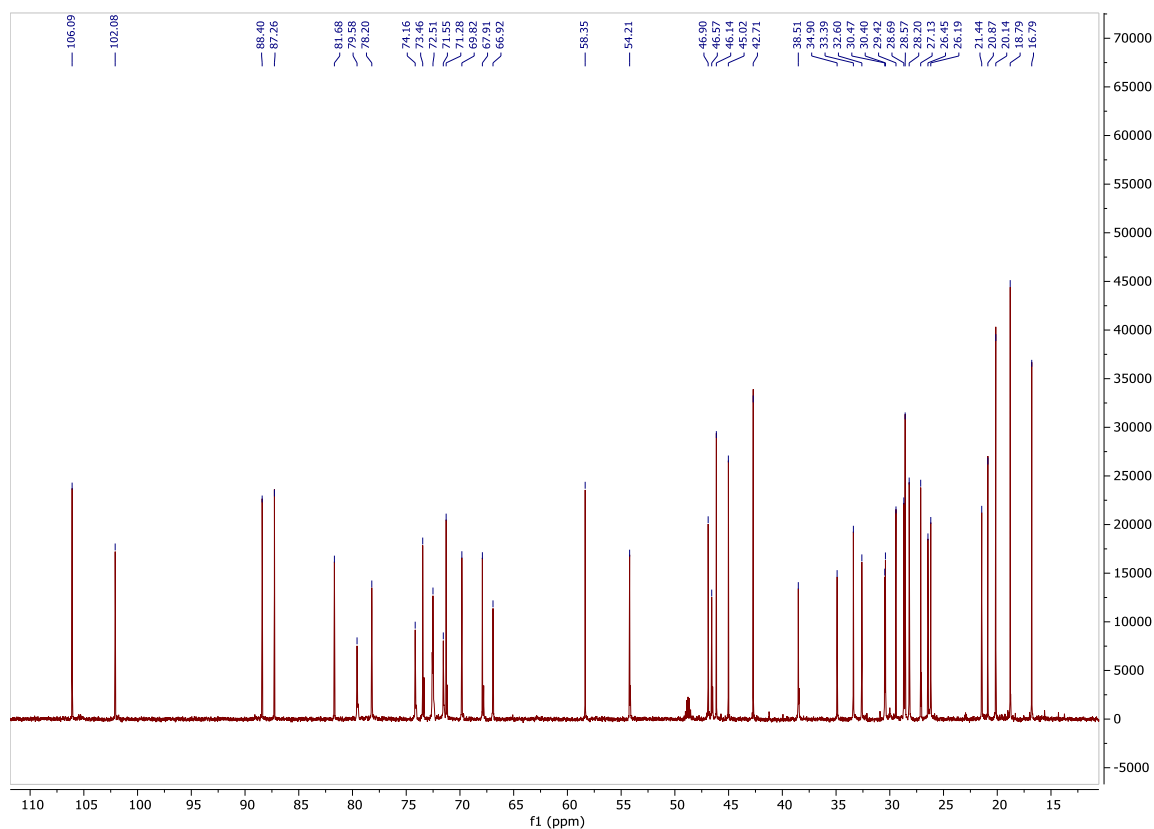

**Figure S14:**  $^{13}\text{C}$ -NMR spectrum (175 MHz, pyridine- $d_5$ ) of compound S2.

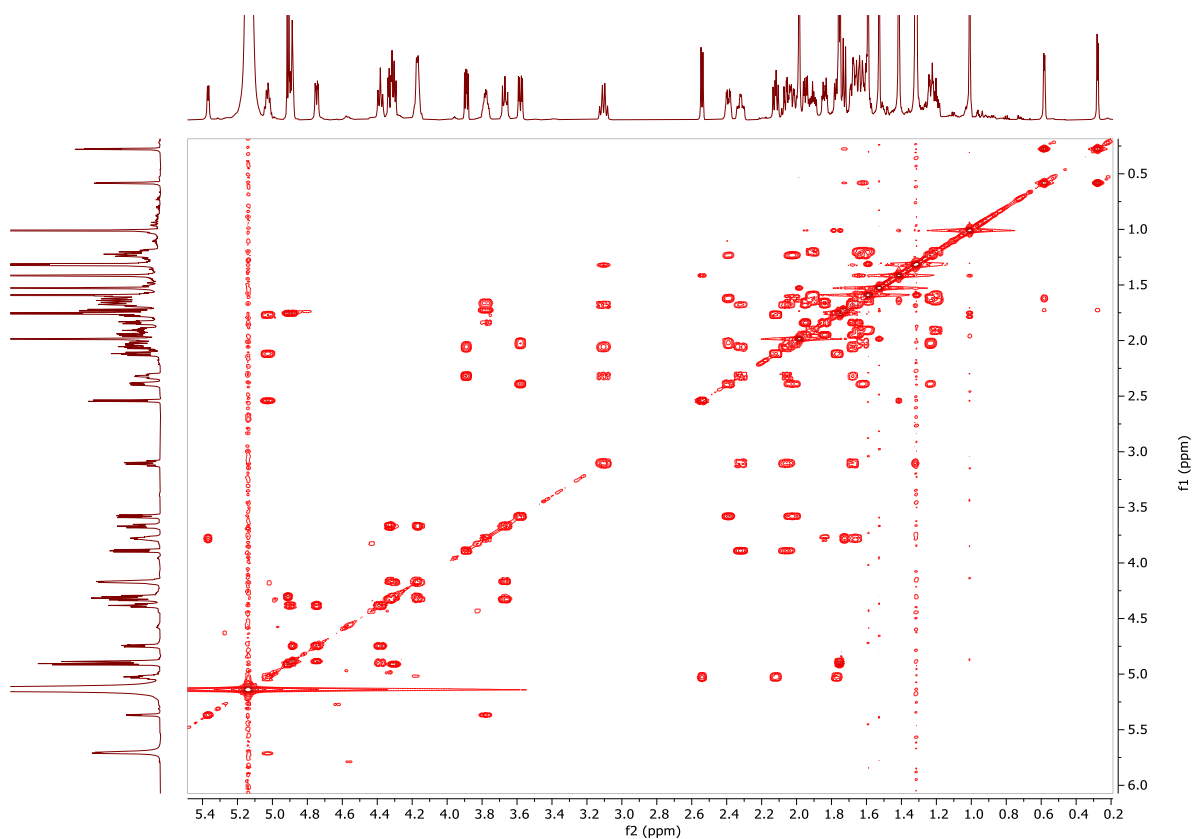

**Figure S15:** COSY spectrum (700 MHz, pyridine- $d_5$ ) of compound S2.

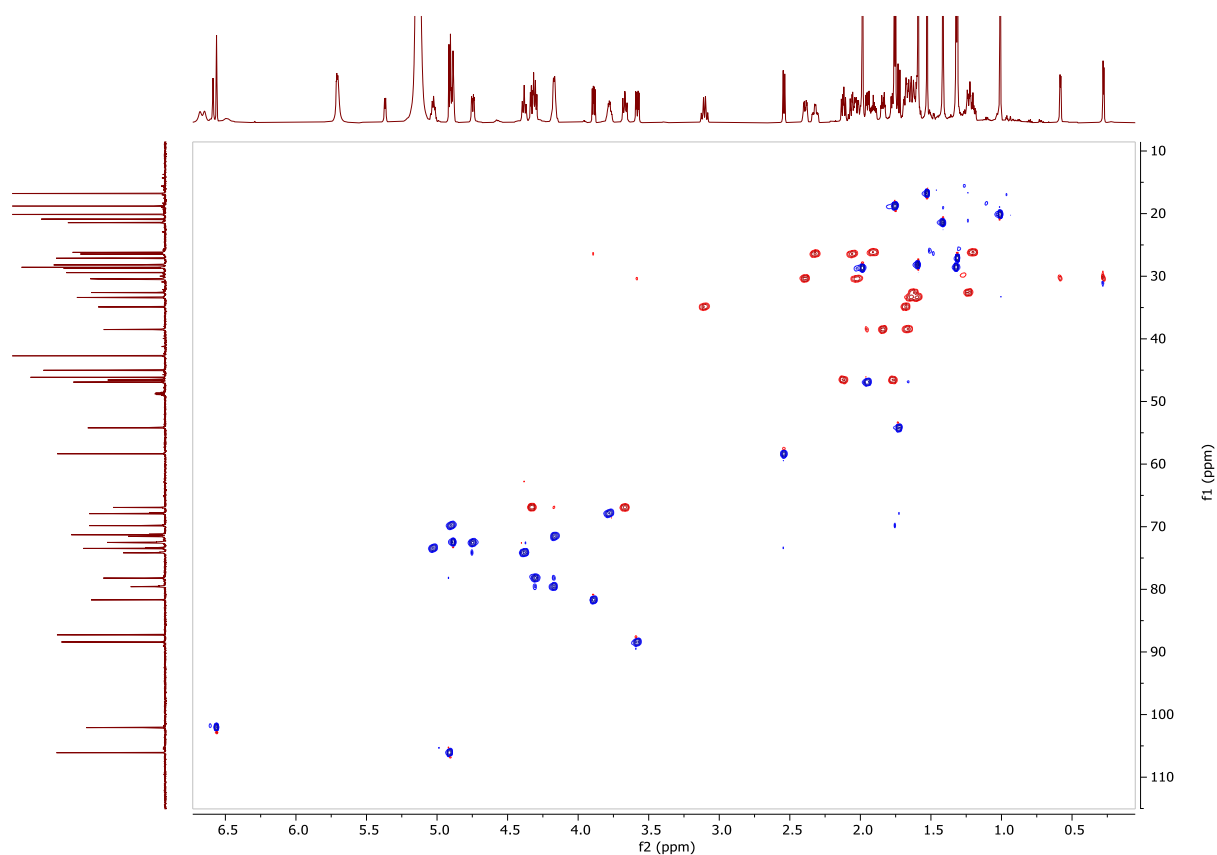

**Figure S16:** HSQC spectrum (700/175 MHz, pyridine- $d_5$ ) of compound **S2**.

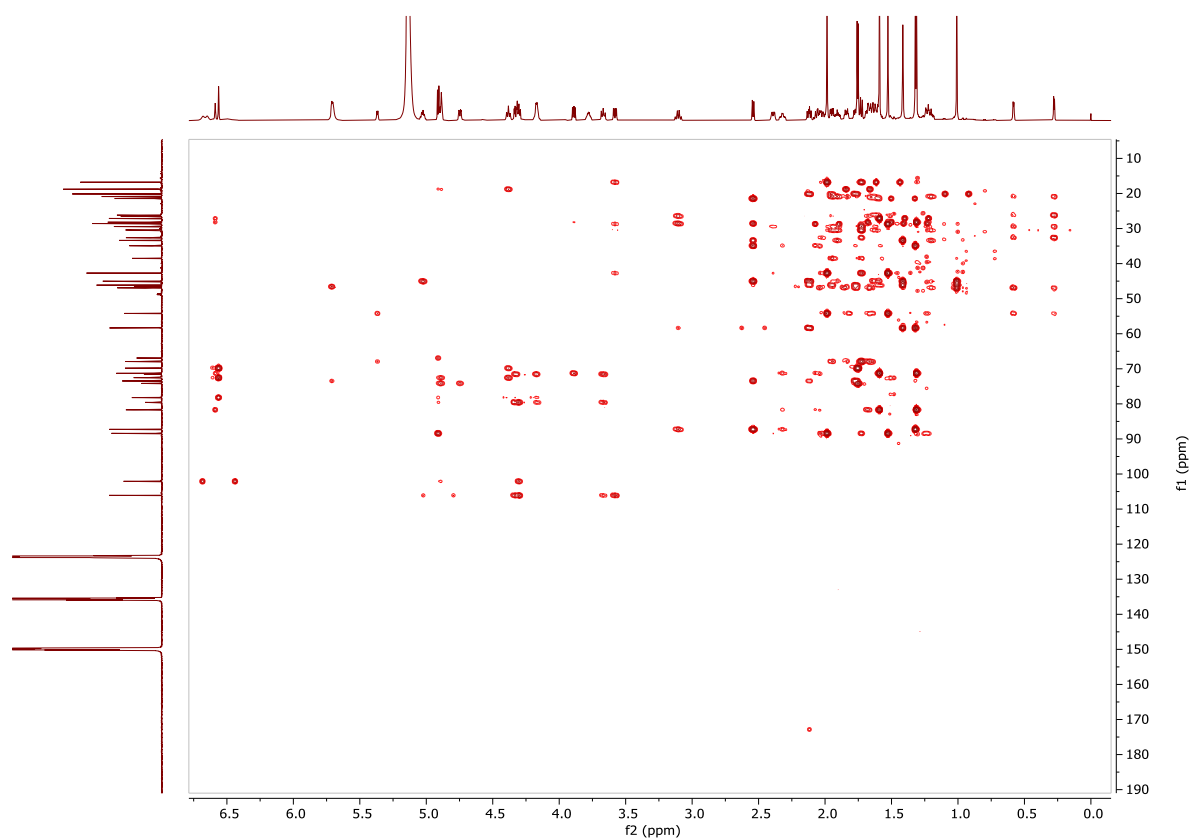

**Figure S17:** HMBC spectrum (700/175 MHz, pyridine- $d_5$ ) of compound **S2**.

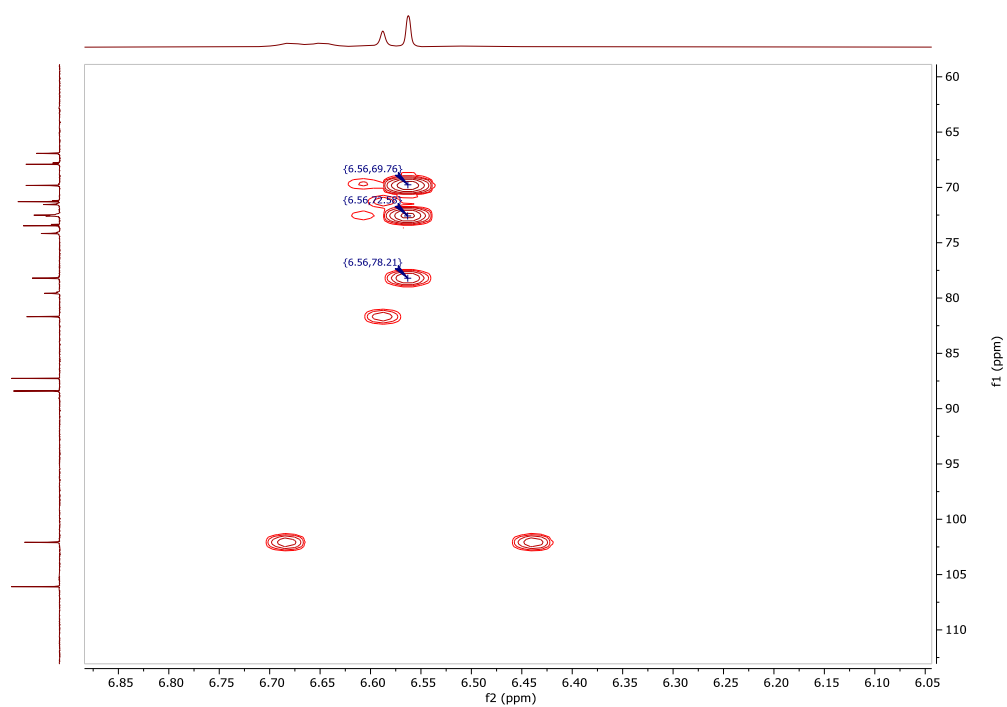

**Figure S18:** Expansion of the sugar region of the HMBC spectrum (700/175 MHz, pyridine-*d*<sub>5</sub>) of compound **S2**.

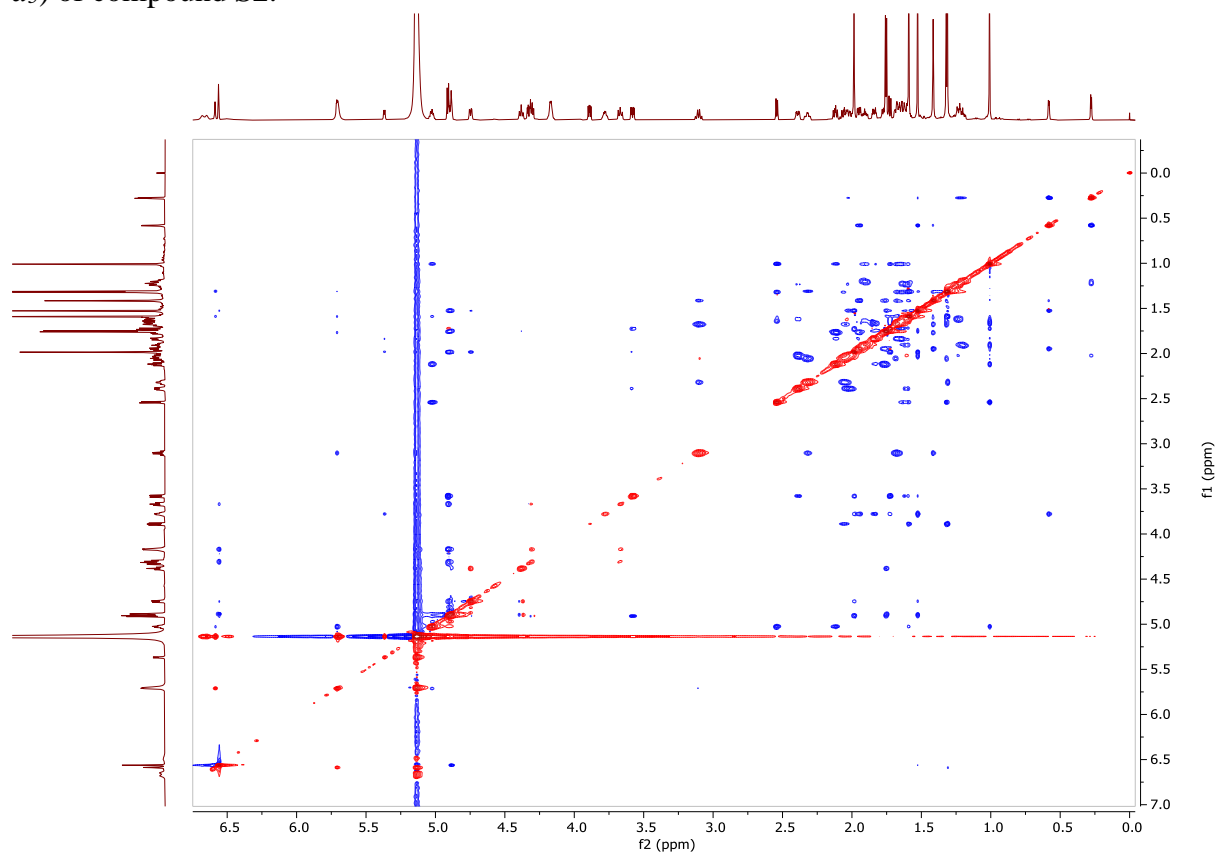

**Figure S19:** ROESY spectrum (700 MHz, pyridine-*d*<sub>5</sub>) of compound **S2**.

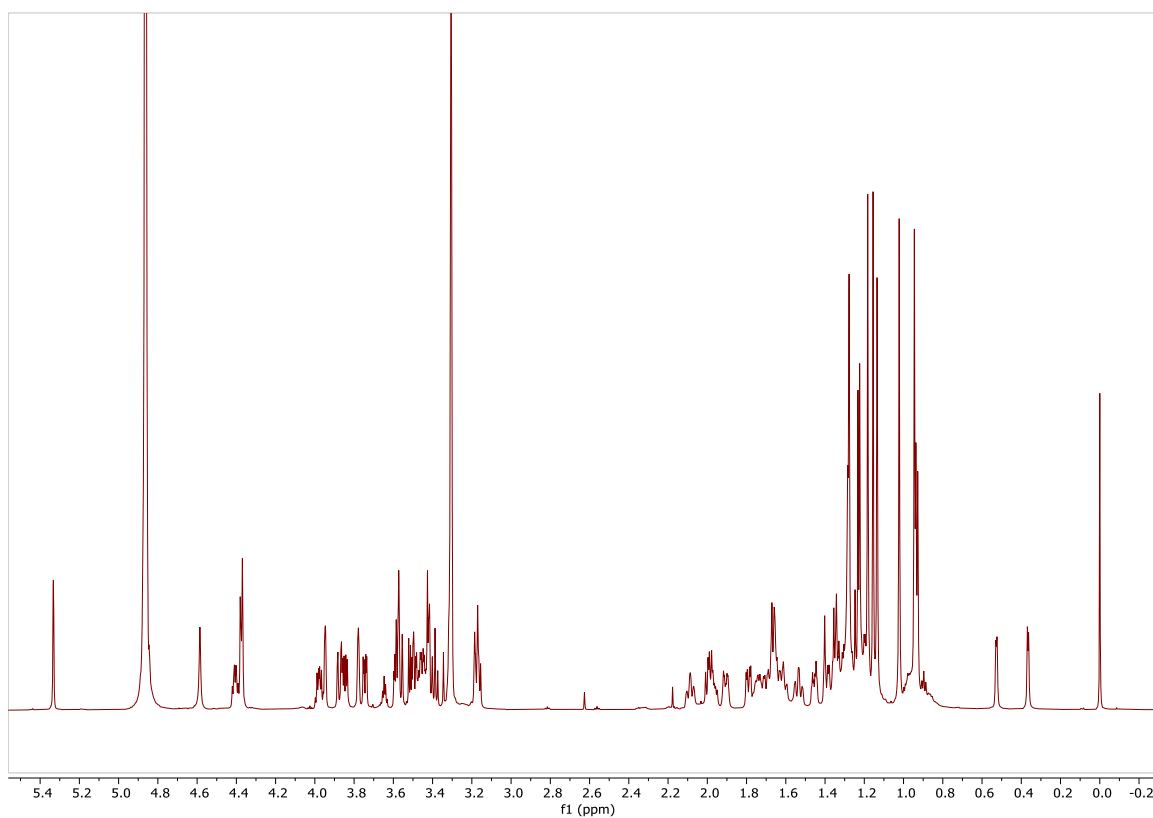

**Figure S20:**  $^1\text{H}$ -NMR spectrum (700 MHz, methanol- $d_4$ ) of compound **S2**.

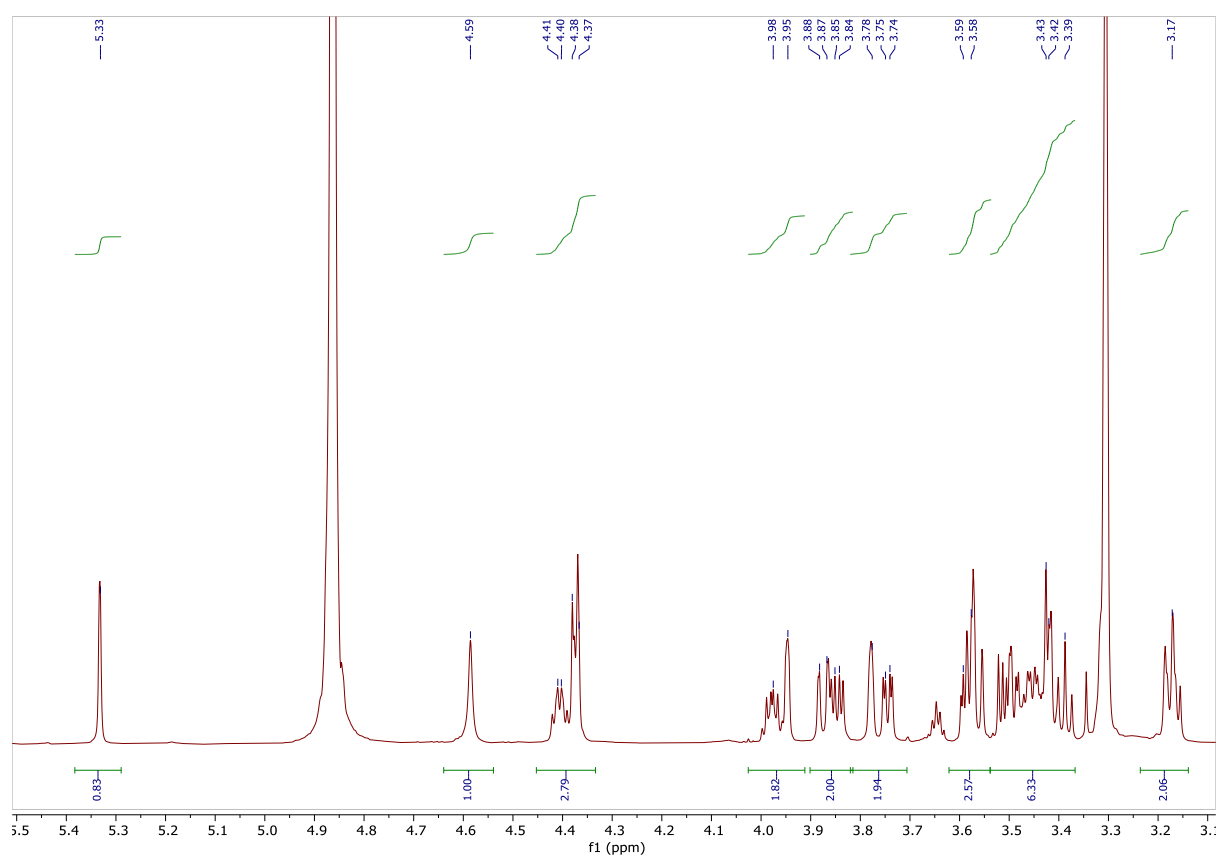

**Figure S21:** Expansion of the  $^1\text{H}$ -NMR (700 MHz, methanol- $d_4$ ) spectrum of compound **S2**.

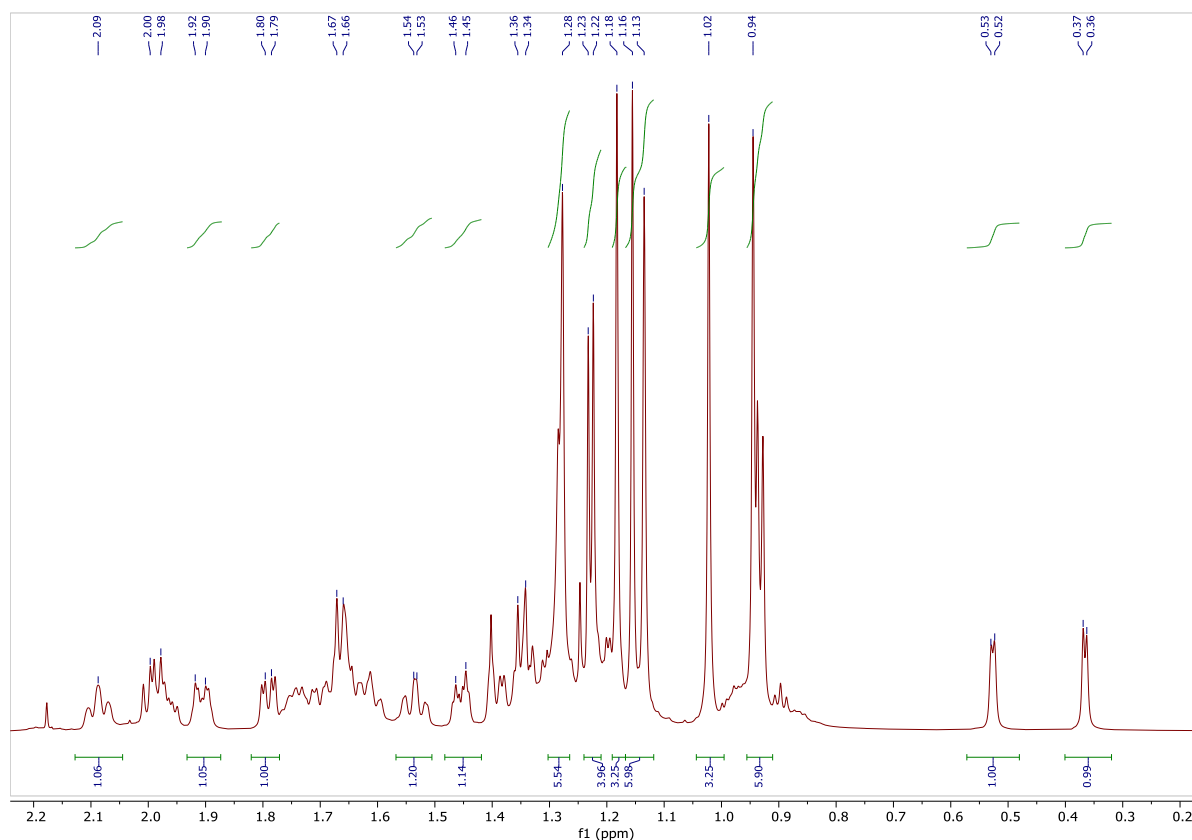

**Figure S22:** Expansion of the <sup>1</sup>H-NMR (700 MHz, methanol-*d*<sub>4</sub>) spectrum of compound S2.

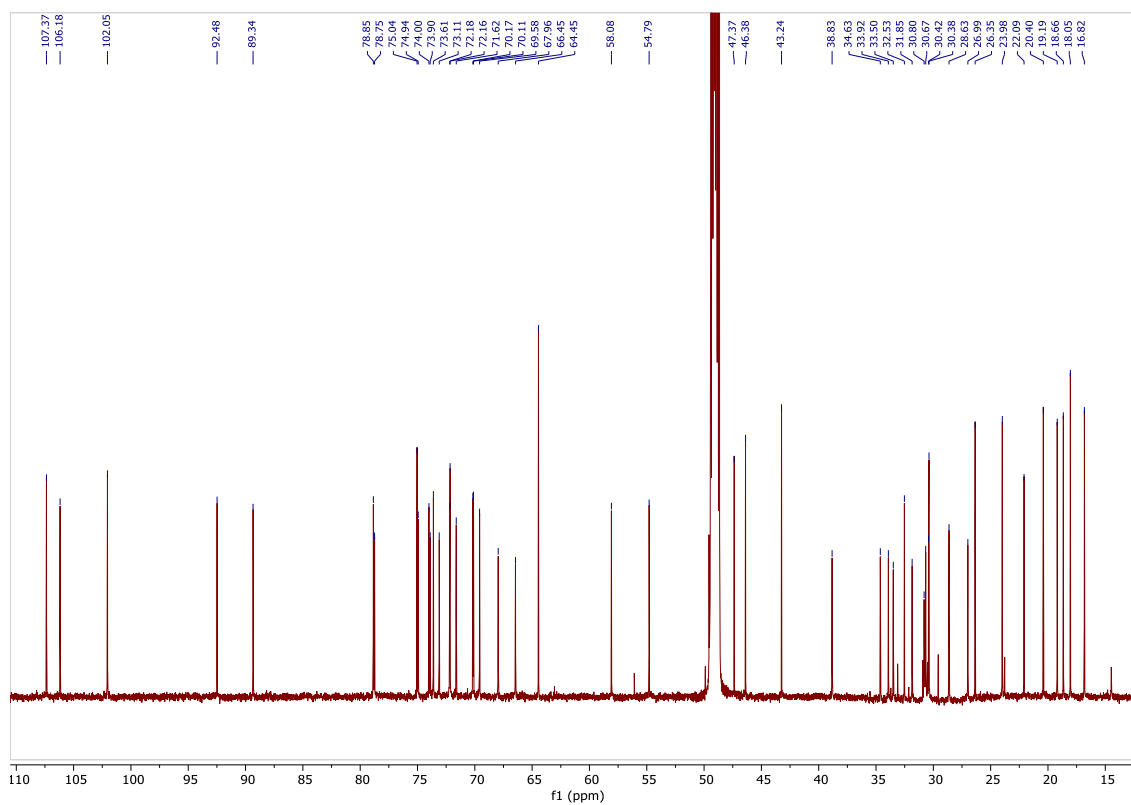

**Figure S23:** <sup>13</sup>C-NMR spectrum (175 MHz, methanol-*d*<sub>4</sub>) of compound S2.

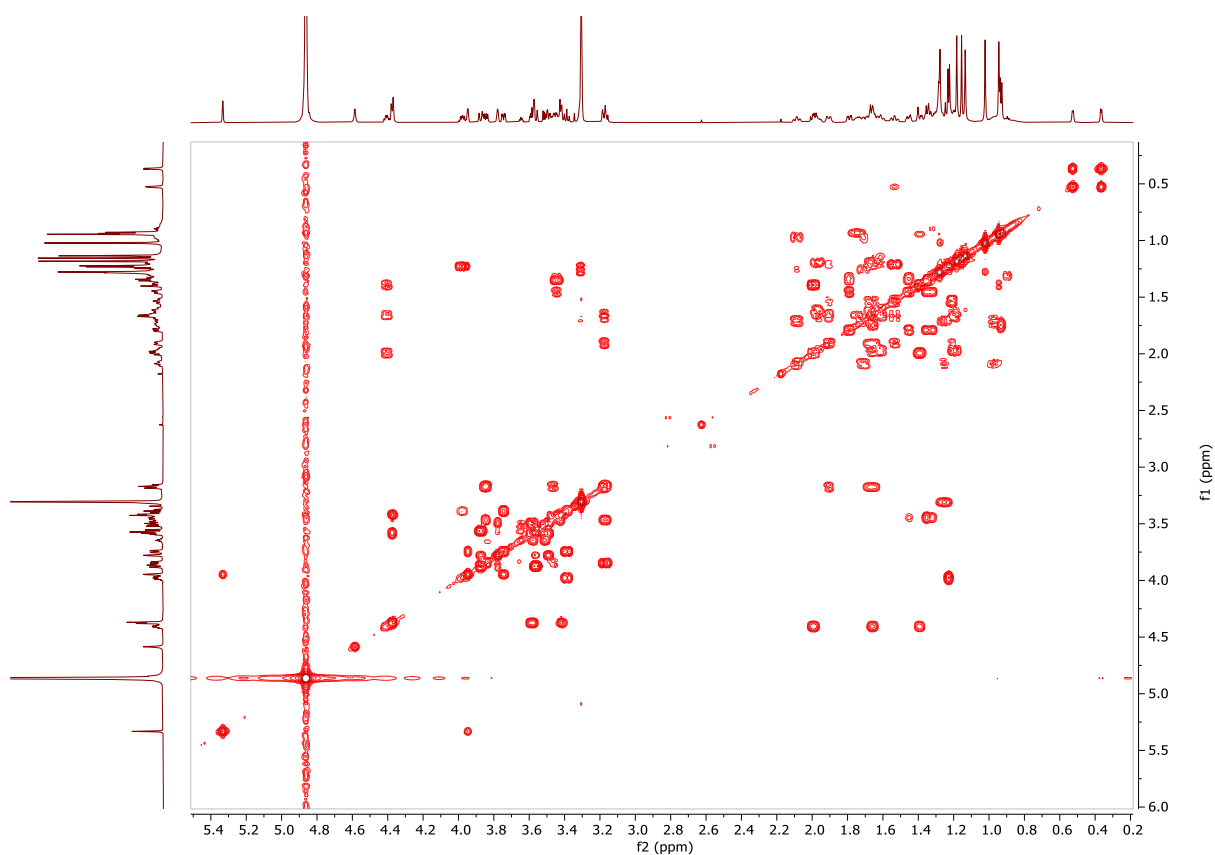

**Figure S24:** COSY spectrum (700 MHz, methanol- $d_4$ ) of compound **S2**.

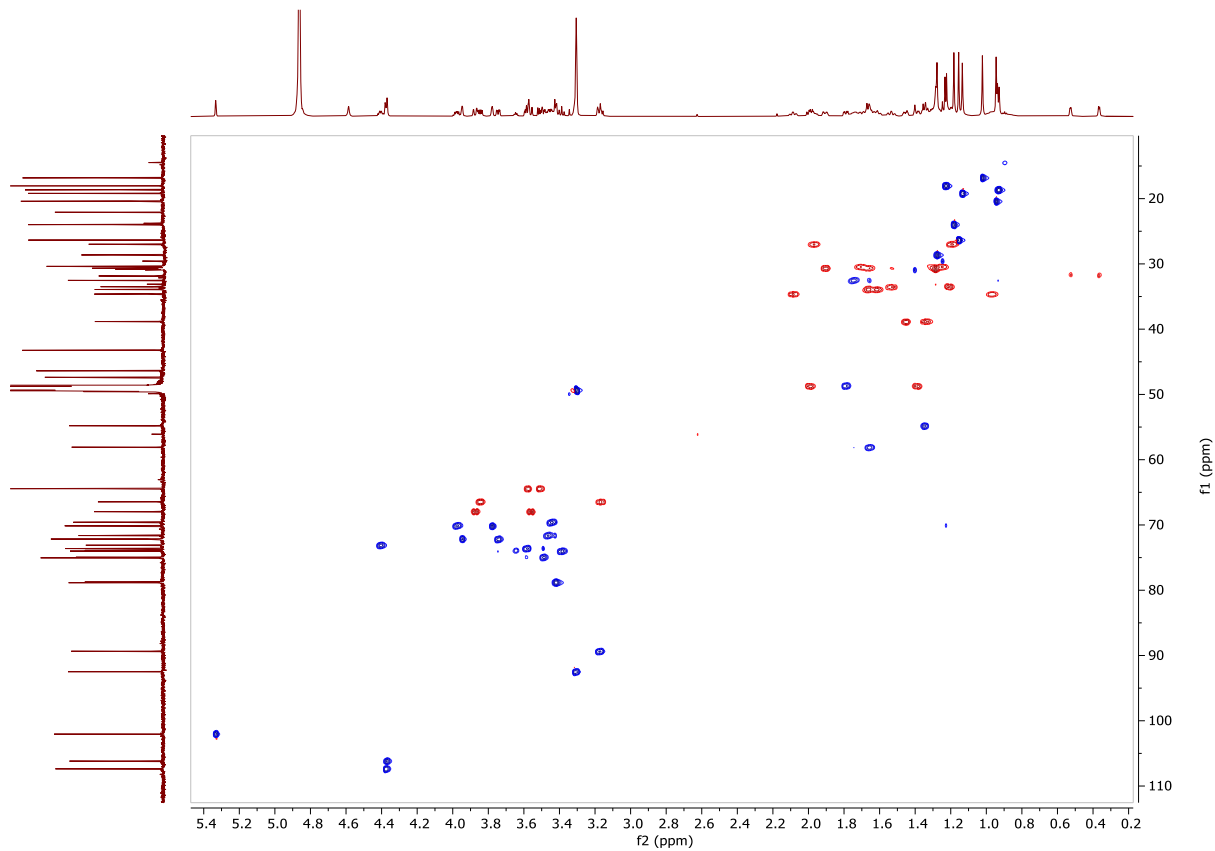

**Figure S25:** HSQC spectrum (700/175 MHz, methanol- $d_4$ ) of compound **S2**.

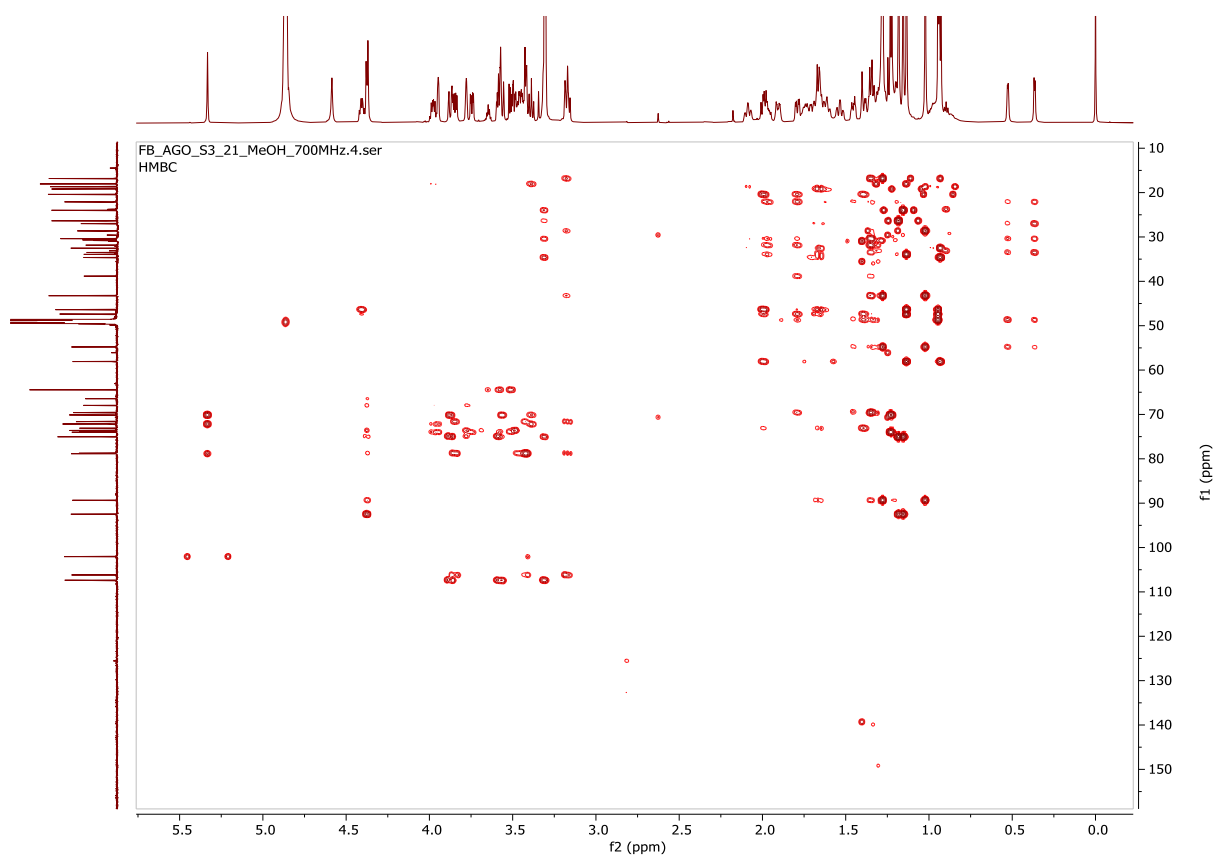

**Figure S26:** HMBC spectrum (700/175 MHz, methanol-*d*<sub>4</sub>) of compound S2.

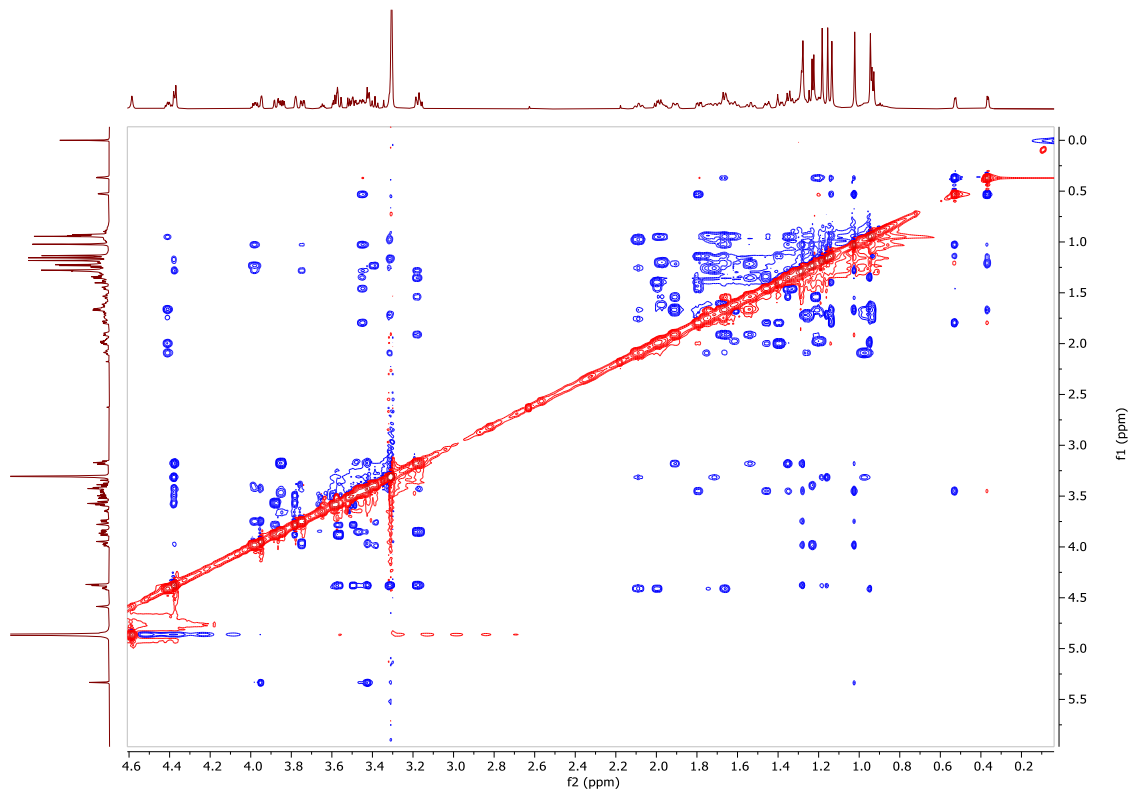

**Figure S27:** ROESY spectrum (700 MHz, pyridine-*d*<sub>5</sub>) of compound S2.

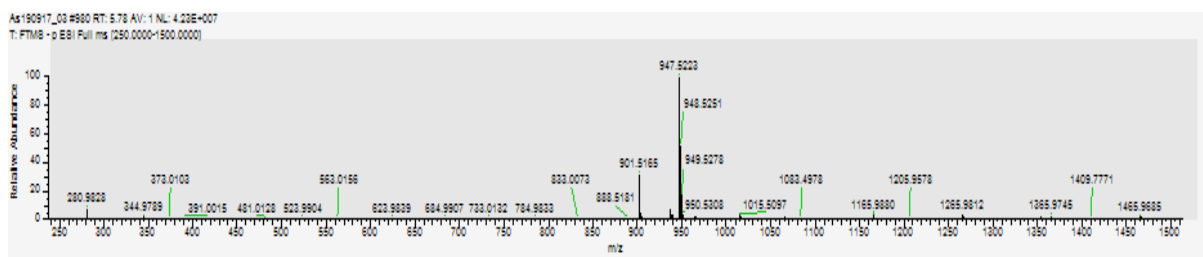

**Figure S28:** HRESIMS of S1 in negative mode

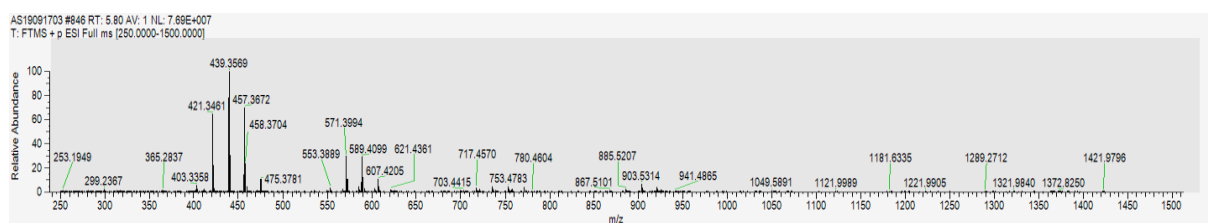

**Figure S29:** HRESIMS of S1 in positive mode

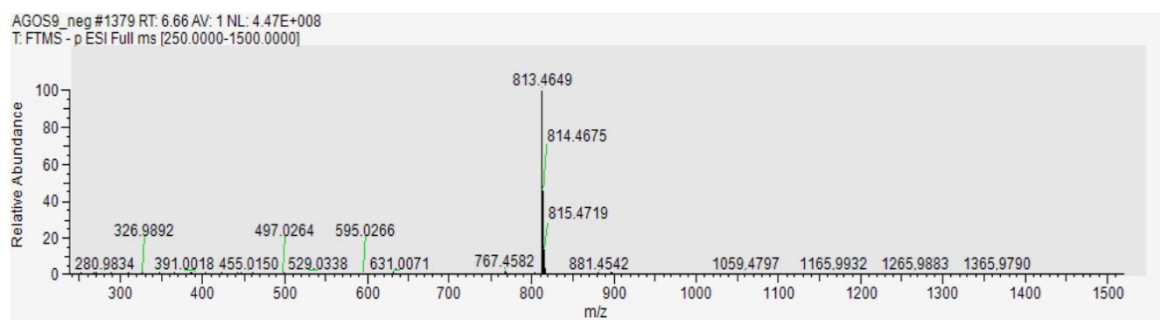

**Figure S30:** HRESIMS of S2 in negative mode

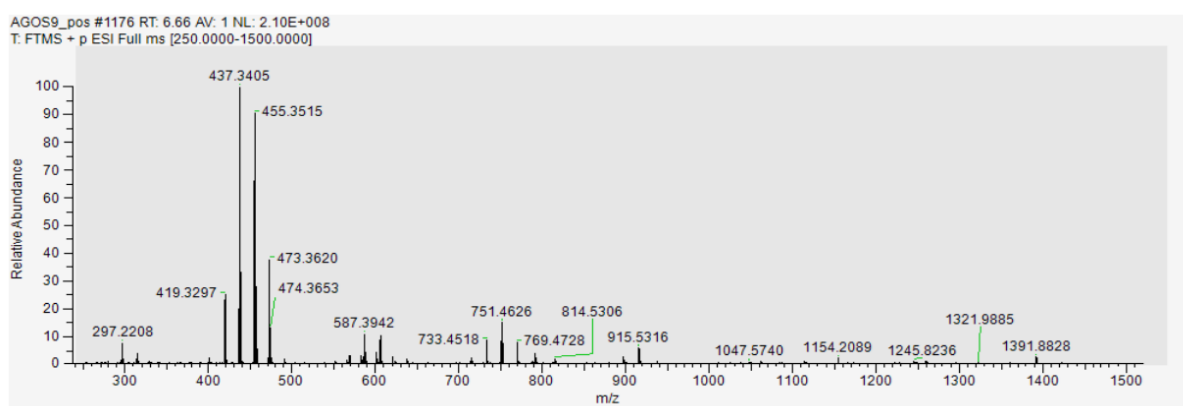

**Figure S31:** HRESIMS of S2 in positive mode

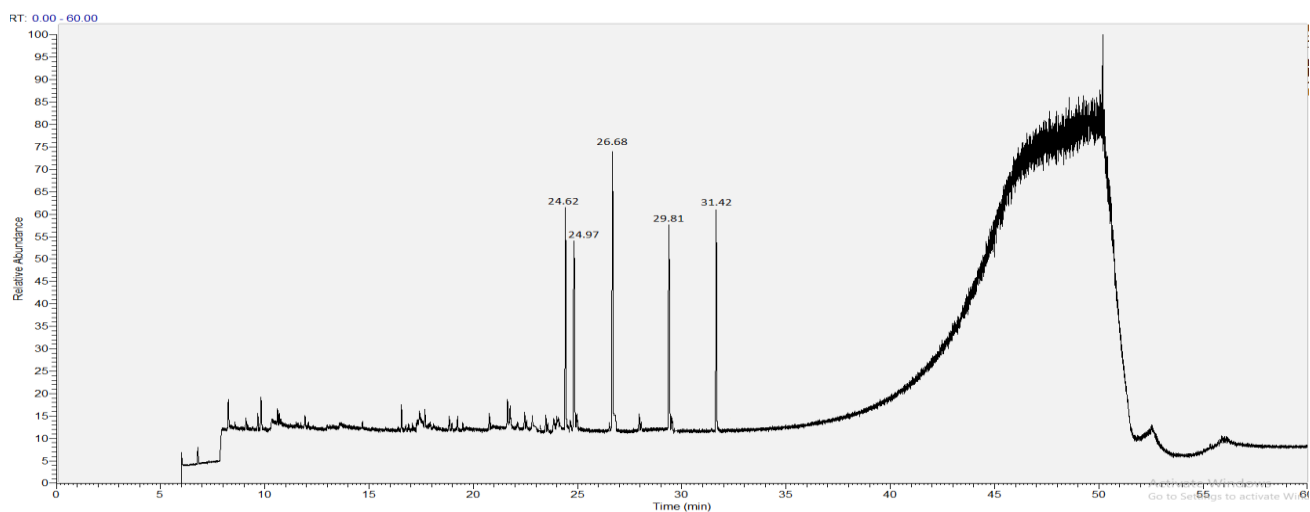

**Figure S32:** GC chromatogram of the monosaccharides of S1

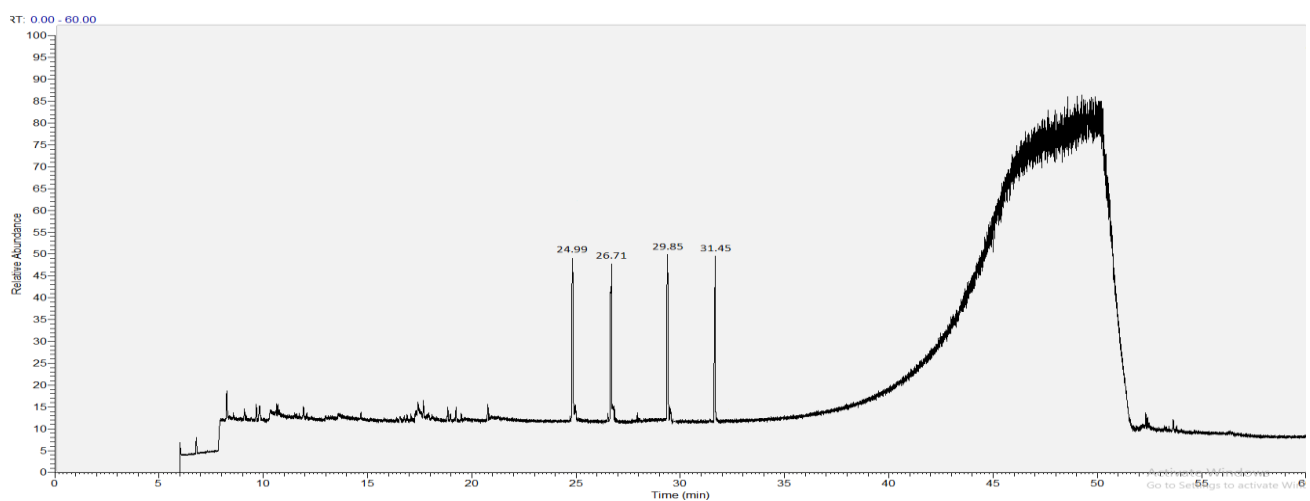

**Figure S33:** GC chromatogram of the monosaccharides of S2
